# Supplementary material for: Superspreaders drive the largest outbreaks of hospital onset COVID-19 infections
Source: eLife. 2021 Aug 24;10:e67308. doi: 10.7554/eLife.67308 (PMC8384420; doi:10.7554/eLife.67308)
Supplement: Figure 1—source data 1. [file elife-67308-fig1-data1.xlsx]

## Sheet: Sheet1
Individual A	Ward	Individual B	Ward	Transmission A to B?
1	A	1	A	Unlikely
1	A	2	A	Consistent
1	A	3	A	Borderline
1	A	4	A	Consistent
1	A	5	A	Consistent
1	A	6	A	Consistent
1	A	7	A	Unlikely
1	A	8	A	Consistent
1	A	9	A	Unlikely
1	A	10	A	Borderline
1	A	11	A	Unlikely
1	A	12	A	Unlikely
1	A	13	A	Unlikely
1	A	14	B	Unlikely
1	A	15	B	Unlikely
1	A	16	B	Unlikely
1	A	17	B	Unlikely
1	A	18	B	Unlikely
1	A	19	B	Unlikely
1	A	20	B	Unlikely
1	A	21	B	Unlikely
1	A	22	B	Unlikely
1	A	23	B	Unlikely
1	A	24	C	Unlikely
1	A	25	C	Unlikely
1	A	26	C	Unlikely
1	A	27	C	Unlikely
1	A	28	C	Unlikely
1	A	29	C	Unlikely
1	A	30	C	Unlikely
1	A	31	C	Unlikely
1	A	32	C	Unlikely
1	A	33	C	Unlikely
1	A	34	C	Unlikely
1	A	35	C	Unlikely
1	A	36	C	Unlikely
1	A	37	C	Unlikely
1	A	38	C	Unlikely
1	A	39	C	Unlikely
1	A	40	C	Unlikely
1	A	41	C	Unlikely
1	A	42	D	Unlikely
1	A	43	D	Unlikely
1	A	44	D	Unlikely
1	A	45	D	Unlikely
1	A	46	D	Unlikely
1	A	47	D	Unlikely
1	A	48	D	Unlikely
1	A	49	D	Unlikely
1	A	50	D	Unlikely
1	A	51	D	Unlikely
1	A	52	D	Unlikely
1	A	53	D	Unlikely
1	A	54	D	Unlikely
1	A	55	D	Unlikely
1	A	56	E	Unlikely
1	A	57	E	Unlikely
1	A	58	E	Unlikely
1	A	59	E	Unlikely
1	A	60	E	Unlikely
1	A	61	E	Unlikely
1	A	62	E	Unlikely
1	A	63	E	Unlikely
1	A	64	E	Unlikely
1	A	65	E	Unlikely
1	A	66	E	Unlikely
1	A	67	E	Unlikely
1	A	68	E	Unlikely
1	A	69	E	Unlikely
1	A	70	E	Unlikely
1	A	71	E	Unlikely
1	A	72	E	Unlikely
1	A	73	E	Unlikely
1	A	74	E	Unlikely
2	A	1	A	Unlikely
2	A	2	A	Unlikely
2	A	3	A	Consistent
2	A	4	A	Consistent
2	A	5	A	Consistent
2	A	6	A	Consistent
2	A	7	A	Consistent
2	A	8	A	Borderline
2	A	9	A	Consistent
2	A	10	A	Consistent
2	A	11	A	Borderline
2	A	12	A	Consistent
2	A	13	A	Unlikely
2	A	14	B	Unlikely
2	A	15	B	Unlikely
2	A	16	B	Unlikely
2	A	17	B	Unlikely
2	A	18	B	Unlikely
2	A	19	B	Unlikely
2	A	20	B	Unlikely
2	A	21	B	Unlikely
2	A	22	B	Unlikely
2	A	23	B	Unlikely
2	A	24	C	Unlikely
2	A	25	C	Unlikely
2	A	26	C	Unlikely
2	A	27	C	Unlikely
2	A	28	C	Unlikely
2	A	29	C	Unlikely
2	A	30	C	Unlikely
2	A	31	C	Unlikely
2	A	32	C	Unlikely
2	A	33	C	Unlikely
2	A	34	C	Unlikely
2	A	35	C	Unlikely
2	A	36	C	Unlikely
2	A	37	C	Unlikely
2	A	38	C	Unlikely
2	A	39	C	Unlikely
2	A	40	C	Unlikely
2	A	41	C	Unlikely
2	A	42	D	Unlikely
2	A	43	D	Unlikely
2	A	44	D	Unlikely
2	A	45	D	Unlikely
2	A	46	D	Unlikely
2	A	47	D	Unlikely
2	A	48	D	Unlikely
2	A	49	D	Unlikely
2	A	50	D	Unlikely
2	A	51	D	Unlikely
2	A	52	D	Unlikely
2	A	53	D	Unlikely
2	A	54	D	Unlikely
2	A	55	D	Unlikely
2	A	56	E	Unlikely
2	A	57	E	Unlikely
2	A	58	E	Unlikely
2	A	59	E	Unlikely
2	A	60	E	Unlikely
2	A	61	E	Unlikely
2	A	62	E	Unlikely
2	A	63	E	Unlikely
2	A	64	E	Unlikely
2	A	65	E	Unlikely
2	A	66	E	Unlikely
2	A	67	E	Unlikely
2	A	68	E	Unlikely
2	A	69	E	Unlikely
2	A	70	E	Unlikely
2	A	71	E	Unlikely
2	A	72	E	Unlikely
2	A	73	E	Unlikely
2	A	74	E	Unlikely
3	A	1	A	Unlikely
3	A	2	A	Consistent
3	A	3	A	Unlikely
3	A	4	A	Consistent
3	A	5	A	Consistent
3	A	6	A	Consistent
3	A	7	A	Consistent
3	A	8	A	Consistent
3	A	9	A	Consistent
3	A	10	A	Consistent
3	A	11	A	Borderline
3	A	12	A	Consistent
3	A	13	A	Unlikely
3	A	14	B	Unlikely
3	A	15	B	Unlikely
3	A	16	B	Unlikely
3	A	17	B	Unlikely
3	A	18	B	Unlikely
3	A	19	B	Unlikely
3	A	20	B	Unlikely
3	A	21	B	Unlikely
3	A	22	B	Unlikely
3	A	23	B	Unlikely
3	A	24	C	Unlikely
3	A	25	C	Unlikely
3	A	26	C	Unlikely
3	A	27	C	Unlikely
3	A	28	C	Unlikely
3	A	29	C	Unlikely
3	A	30	C	Unlikely
3	A	31	C	Unlikely
3	A	32	C	Unlikely
3	A	33	C	Unlikely
3	A	34	C	Unlikely
3	A	35	C	Unlikely
3	A	36	C	Unlikely
3	A	37	C	Unlikely
3	A	38	C	Unlikely
3	A	39	C	Unlikely
3	A	40	C	Unlikely
3	A	41	C	Unlikely
3	A	42	D	Unlikely
3	A	43	D	Unlikely
3	A	44	D	Unlikely
3	A	45	D	Unlikely
3	A	46	D	Unlikely
3	A	47	D	Unlikely
3	A	48	D	Unlikely
3	A	49	D	Unlikely
3	A	50	D	Unlikely
3	A	51	D	Unlikely
3	A	52	D	Unlikely
3	A	53	D	Unlikely
3	A	54	D	Unlikely
3	A	55	D	Unlikely
3	A	56	E	Unlikely
3	A	57	E	Unlikely
3	A	58	E	Unlikely
3	A	59	E	Unlikely
3	A	60	E	Unlikely
3	A	61	E	Unlikely
3	A	62	E	Unlikely
3	A	63	E	Unlikely
3	A	64	E	Unlikely
3	A	65	E	Unlikely
3	A	66	E	Unlikely
3	A	67	E	Unlikely
3	A	68	E	Unlikely
3	A	69	E	Unlikely
3	A	70	E	Unlikely
3	A	71	E	Unlikely
3	A	72	E	Unlikely
3	A	73	E	Unlikely
3	A	74	E	Unlikely
4	A	1	A	Unlikely
4	A	2	A	Consistent
4	A	3	A	Consistent
4	A	4	A	Unlikely
4	A	5	A	Consistent
4	A	6	A	Consistent
4	A	7	A	Consistent
4	A	8	A	Consistent
4	A	9	A	Consistent
4	A	10	A	Consistent
4	A	11	A	Unlikely
4	A	12	A	Consistent
4	A	13	A	Unlikely
4	A	14	B	Unlikely
4	A	15	B	Unlikely
4	A	16	B	Unlikely
4	A	17	B	Unlikely
4	A	18	B	Unlikely
4	A	19	B	Unlikely
4	A	20	B	Unlikely
4	A	21	B	Unlikely
4	A	22	B	Unlikely
4	A	23	B	Unlikely
4	A	24	C	Unlikely
4	A	25	C	Unlikely
4	A	26	C	Unlikely
4	A	27	C	Unlikely
4	A	28	C	Unlikely
4	A	29	C	Unlikely
4	A	30	C	Unlikely
4	A	31	C	Unlikely
4	A	32	C	Unlikely
4	A	33	C	Unlikely
4	A	34	C	Unlikely
4	A	35	C	Unlikely
4	A	36	C	Unlikely
4	A	37	C	Unlikely
4	A	38	C	Unlikely
4	A	39	C	Unlikely
4	A	40	C	Unlikely
4	A	41	C	Unlikely
4	A	42	D	Unlikely
4	A	43	D	Unlikely
4	A	44	D	Unlikely
4	A	45	D	Unlikely
4	A	46	D	Unlikely
4	A	47	D	Unlikely
4	A	48	D	Unlikely
4	A	49	D	Unlikely
4	A	50	D	Unlikely
4	A	51	D	Unlikely
4	A	52	D	Unlikely
4	A	53	D	Unlikely
4	A	54	D	Unlikely
4	A	55	D	Unlikely
4	A	56	E	Unlikely
4	A	57	E	Unlikely
4	A	58	E	Unlikely
4	A	59	E	Unlikely
4	A	60	E	Unlikely
4	A	61	E	Unlikely
4	A	62	E	Unlikely
4	A	63	E	Unlikely
4	A	64	E	Unlikely
4	A	65	E	Unlikely
4	A	66	E	Unlikely
4	A	67	E	Unlikely
4	A	68	E	Unlikely
4	A	69	E	Unlikely
4	A	70	E	Unlikely
4	A	71	E	Unlikely
4	A	72	E	Unlikely
4	A	73	E	Unlikely
4	A	74	E	Unlikely
5	A	1	A	Unlikely
5	A	2	A	Consistent
5	A	3	A	Consistent
5	A	4	A	Consistent
5	A	5	A	Unlikely
5	A	6	A	Consistent
5	A	7	A	Consistent
5	A	8	A	Consistent
5	A	9	A	Consistent
5	A	10	A	Consistent
5	A	11	A	Borderline
5	A	12	A	Consistent
5	A	13	A	Unlikely
5	A	14	B	Unlikely
5	A	15	B	Unlikely
5	A	16	B	Unlikely
5	A	17	B	Unlikely
5	A	18	B	Unlikely
5	A	19	B	Unlikely
5	A	20	B	Unlikely
5	A	21	B	Unlikely
5	A	22	B	Unlikely
5	A	23	B	Unlikely
5	A	24	C	Unlikely
5	A	25	C	Unlikely
5	A	26	C	Unlikely
5	A	27	C	Unlikely
5	A	28	C	Unlikely
5	A	29	C	Unlikely
5	A	30	C	Unlikely
5	A	31	C	Unlikely
5	A	32	C	Unlikely
5	A	33	C	Unlikely
5	A	34	C	Unlikely
5	A	35	C	Unlikely
5	A	36	C	Unlikely
5	A	37	C	Unlikely
5	A	38	C	Unlikely
5	A	39	C	Unlikely
5	A	40	C	Unlikely
5	A	41	C	Unlikely
5	A	42	D	Unlikely
5	A	43	D	Unlikely
5	A	44	D	Unlikely
5	A	45	D	Unlikely
5	A	46	D	Unlikely
5	A	47	D	Unlikely
5	A	48	D	Unlikely
5	A	49	D	Unlikely
5	A	50	D	Unlikely
5	A	51	D	Unlikely
5	A	52	D	Unlikely
5	A	53	D	Unlikely
5	A	54	D	Unlikely
5	A	55	D	Unlikely
5	A	56	E	Unlikely
5	A	57	E	Unlikely
5	A	58	E	Unlikely
5	A	59	E	Unlikely
5	A	60	E	Unlikely
5	A	61	E	Unlikely
5	A	62	E	Unlikely
5	A	63	E	Unlikely
5	A	64	E	Unlikely
5	A	65	E	Unlikely
5	A	66	E	Unlikely
5	A	67	E	Unlikely
5	A	68	E	Unlikely
5	A	69	E	Unlikely
5	A	70	E	Unlikely
5	A	71	E	Unlikely
5	A	72	E	Unlikely
5	A	73	E	Unlikely
5	A	74	E	Unlikely
6	A	1	A	Unlikely
6	A	2	A	Consistent
6	A	3	A	Consistent
6	A	4	A	Consistent
6	A	5	A	Consistent
6	A	6	A	Unlikely
6	A	7	A	Consistent
6	A	8	A	Consistent
6	A	9	A	Consistent
6	A	10	A	Consistent
6	A	11	A	Borderline
6	A	12	A	Consistent
6	A	13	A	Unlikely
6	A	14	B	Unlikely
6	A	15	B	Unlikely
6	A	16	B	Unlikely
6	A	17	B	Unlikely
6	A	18	B	Unlikely
6	A	19	B	Unlikely
6	A	20	B	Unlikely
6	A	21	B	Unlikely
6	A	22	B	Unlikely
6	A	23	B	Unlikely
6	A	24	C	Unlikely
6	A	25	C	Unlikely
6	A	26	C	Unlikely
6	A	27	C	Unlikely
6	A	28	C	Unlikely
6	A	29	C	Unlikely
6	A	30	C	Unlikely
6	A	31	C	Unlikely
6	A	32	C	Unlikely
6	A	33	C	Unlikely
6	A	34	C	Unlikely
6	A	35	C	Unlikely
6	A	36	C	Unlikely
6	A	37	C	Unlikely
6	A	38	C	Unlikely
6	A	39	C	Unlikely
6	A	40	C	Unlikely
6	A	41	C	Unlikely
6	A	42	D	Unlikely
6	A	43	D	Unlikely
6	A	44	D	Unlikely
6	A	45	D	Unlikely
6	A	46	D	Unlikely
6	A	47	D	Unlikely
6	A	48	D	Unlikely
6	A	49	D	Unlikely
6	A	50	D	Unlikely
6	A	51	D	Unlikely
6	A	52	D	Unlikely
6	A	53	D	Unlikely
6	A	54	D	Unlikely
6	A	55	D	Unlikely
6	A	56	E	Unlikely
6	A	57	E	Unlikely
6	A	58	E	Unlikely
6	A	59	E	Unlikely
6	A	60	E	Unlikely
6	A	61	E	Unlikely
6	A	62	E	Unlikely
6	A	63	E	Unlikely
6	A	64	E	Unlikely
6	A	65	E	Unlikely
6	A	66	E	Unlikely
6	A	67	E	Unlikely
6	A	68	E	Unlikely
6	A	69	E	Unlikely
6	A	70	E	Unlikely
6	A	71	E	Unlikely
6	A	72	E	Unlikely
6	A	73	E	Unlikely
6	A	74	E	Unlikely
7	A	1	A	Unlikely
7	A	2	A	Consistent
7	A	3	A	Consistent
7	A	4	A	Consistent
7	A	5	A	Consistent
7	A	6	A	Consistent
7	A	7	A	Unlikely
7	A	8	A	Consistent
7	A	9	A	Consistent
7	A	10	A	Consistent
7	A	11	A	Borderline
7	A	12	A	Consistent
7	A	13	A	Unlikely
7	A	14	B	Unlikely
7	A	15	B	Unlikely
7	A	16	B	Unlikely
7	A	17	B	Unlikely
7	A	18	B	Unlikely
7	A	19	B	Unlikely
7	A	20	B	Unlikely
7	A	21	B	Unlikely
7	A	22	B	Unlikely
7	A	23	B	Unlikely
7	A	24	C	Unlikely
7	A	25	C	Unlikely
7	A	26	C	Unlikely
7	A	27	C	Unlikely
7	A	28	C	Unlikely
7	A	29	C	Unlikely
7	A	30	C	Unlikely
7	A	31	C	Unlikely
7	A	32	C	Unlikely
7	A	33	C	Unlikely
7	A	34	C	Unlikely
7	A	35	C	Unlikely
7	A	36	C	Unlikely
7	A	37	C	Unlikely
7	A	38	C	Unlikely
7	A	39	C	Unlikely
7	A	40	C	Unlikely
7	A	41	C	Unlikely
7	A	42	D	Unlikely
7	A	43	D	Unlikely
7	A	44	D	Unlikely
7	A	45	D	Unlikely
7	A	46	D	Unlikely
7	A	47	D	Unlikely
7	A	48	D	Unlikely
7	A	49	D	Unlikely
7	A	50	D	Unlikely
7	A	51	D	Unlikely
7	A	52	D	Unlikely
7	A	53	D	Unlikely
7	A	54	D	Unlikely
7	A	55	D	Unlikely
7	A	56	E	Unlikely
7	A	57	E	Unlikely
7	A	58	E	Unlikely
7	A	59	E	Unlikely
7	A	60	E	Unlikely
7	A	61	E	Unlikely
7	A	62	E	Unlikely
7	A	63	E	Unlikely
7	A	64	E	Unlikely
7	A	65	E	Unlikely
7	A	66	E	Unlikely
7	A	67	E	Unlikely
7	A	68	E	Unlikely
7	A	69	E	Unlikely
7	A	70	E	Unlikely
7	A	71	E	Unlikely
7	A	72	E	Unlikely
7	A	73	E	Unlikely
7	A	74	E	Unlikely
8	A	1	A	Unlikely
8	A	2	A	Consistent
8	A	3	A	Consistent
8	A	4	A	Consistent
8	A	5	A	Consistent
8	A	6	A	Consistent
8	A	7	A	Consistent
8	A	8	A	Unlikely
8	A	9	A	Consistent
8	A	10	A	Consistent
8	A	11	A	Borderline
8	A	12	A	Consistent
8	A	13	A	Unlikely
8	A	14	B	Unlikely
8	A	15	B	Unlikely
8	A	16	B	Unlikely
8	A	17	B	Unlikely
8	A	18	B	Unlikely
8	A	19	B	Unlikely
8	A	20	B	Unlikely
8	A	21	B	Unlikely
8	A	22	B	Unlikely
8	A	23	B	Unlikely
8	A	24	C	Unlikely
8	A	25	C	Unlikely
8	A	26	C	Unlikely
8	A	27	C	Unlikely
8	A	28	C	Unlikely
8	A	29	C	Unlikely
8	A	30	C	Unlikely
8	A	31	C	Unlikely
8	A	32	C	Unlikely
8	A	33	C	Unlikely
8	A	34	C	Unlikely
8	A	35	C	Unlikely
8	A	36	C	Unlikely
8	A	37	C	Unlikely
8	A	38	C	Unlikely
8	A	39	C	Unlikely
8	A	40	C	Unlikely
8	A	41	C	Unlikely
8	A	42	D	Unlikely
8	A	43	D	Unlikely
8	A	44	D	Unlikely
8	A	45	D	Unlikely
8	A	46	D	Unlikely
8	A	47	D	Unlikely
8	A	48	D	Unlikely
8	A	49	D	Unlikely
8	A	50	D	Unlikely
8	A	51	D	Unlikely
8	A	52	D	Unlikely
8	A	53	D	Unlikely
8	A	54	D	Unlikely
8	A	55	D	Unlikely
8	A	56	E	Unlikely
8	A	57	E	Unlikely
8	A	58	E	Unlikely
8	A	59	E	Unlikely
8	A	60	E	Unlikely
8	A	61	E	Unlikely
8	A	62	E	Unlikely
8	A	63	E	Unlikely
8	A	64	E	Unlikely
8	A	65	E	Unlikely
8	A	66	E	Unlikely
8	A	67	E	Unlikely
8	A	68	E	Unlikely
8	A	69	E	Unlikely
8	A	70	E	Unlikely
8	A	71	E	Unlikely
8	A	72	E	Unlikely
8	A	73	E	Unlikely
8	A	74	E	Unlikely
9	A	1	A	Unlikely
9	A	2	A	Consistent
9	A	3	A	Borderline
9	A	4	A	Borderline
9	A	5	A	Borderline
9	A	6	A	Consistent
9	A	7	A	Consistent
9	A	8	A	Unlikely
9	A	9	A	Unlikely
9	A	10	A	Consistent
9	A	11	A	Borderline
9	A	12	A	Consistent
9	A	13	A	Unlikely
9	A	14	B	Unlikely
9	A	15	B	Unlikely
9	A	16	B	Unlikely
9	A	17	B	Unlikely
9	A	18	B	Unlikely
9	A	19	B	Unlikely
9	A	20	B	Unlikely
9	A	21	B	Unlikely
9	A	22	B	Unlikely
9	A	23	B	Unlikely
9	A	24	C	Unlikely
9	A	25	C	Unlikely
9	A	26	C	Unlikely
9	A	27	C	Unlikely
9	A	28	C	Unlikely
9	A	29	C	Unlikely
9	A	30	C	Unlikely
9	A	31	C	Unlikely
9	A	32	C	Unlikely
9	A	33	C	Unlikely
9	A	34	C	Unlikely
9	A	35	C	Unlikely
9	A	36	C	Unlikely
9	A	37	C	Unlikely
9	A	38	C	Unlikely
9	A	39	C	Unlikely
9	A	40	C	Unlikely
9	A	41	C	Unlikely
9	A	42	D	Unlikely
9	A	43	D	Unlikely
9	A	44	D	Unlikely
9	A	45	D	Unlikely
9	A	46	D	Unlikely
9	A	47	D	Unlikely
9	A	48	D	Unlikely
9	A	49	D	Unlikely
9	A	50	D	Unlikely
9	A	51	D	Unlikely
9	A	52	D	Unlikely
9	A	53	D	Unlikely
9	A	54	D	Unlikely
9	A	55	D	Unlikely
9	A	56	E	Unlikely
9	A	57	E	Unlikely
9	A	58	E	Unlikely
9	A	59	E	Unlikely
9	A	60	E	Unlikely
9	A	61	E	Unlikely
9	A	62	E	Unlikely
9	A	63	E	Unlikely
9	A	64	E	Unlikely
9	A	65	E	Unlikely
9	A	66	E	Unlikely
9	A	67	E	Unlikely
9	A	68	E	Unlikely
9	A	69	E	Unlikely
9	A	70	E	Unlikely
9	A	71	E	Unlikely
9	A	72	E	Unlikely
9	A	73	E	Unlikely
9	A	74	E	Unlikely
10	A	1	A	Unlikely
10	A	2	A	Consistent
10	A	3	A	Borderline
10	A	4	A	Borderline
10	A	5	A	Borderline
10	A	6	A	Borderline
10	A	7	A	Consistent
10	A	8	A	Unlikely
10	A	9	A	Consistent
10	A	10	A	Unlikely
10	A	11	A	Unlikely
10	A	12	A	Consistent
10	A	13	A	Unlikely
10	A	14	B	Unlikely
10	A	15	B	Unlikely
10	A	16	B	Unlikely
10	A	17	B	Unlikely
10	A	18	B	Unlikely
10	A	19	B	Unlikely
10	A	20	B	Unlikely
10	A	21	B	Unlikely
10	A	22	B	Unlikely
10	A	23	B	Unlikely
10	A	24	C	Unlikely
10	A	25	C	Unlikely
10	A	26	C	Unlikely
10	A	27	C	Unlikely
10	A	28	C	Unlikely
10	A	29	C	Unlikely
10	A	30	C	Unlikely
10	A	31	C	Unlikely
10	A	32	C	Unlikely
10	A	33	C	Unlikely
10	A	34	C	Unlikely
10	A	35	C	Unlikely
10	A	36	C	Unlikely
10	A	37	C	Unlikely
10	A	38	C	Unlikely
10	A	39	C	Unlikely
10	A	40	C	Unlikely
10	A	41	C	Unlikely
10	A	42	D	Unlikely
10	A	43	D	Unlikely
10	A	44	D	Unlikely
10	A	45	D	Unlikely
10	A	46	D	Unlikely
10	A	47	D	Unlikely
10	A	48	D	Unlikely
10	A	49	D	Unlikely
10	A	50	D	Unlikely
10	A	51	D	Unlikely
10	A	52	D	Unlikely
10	A	53	D	Unlikely
10	A	54	D	Unlikely
10	A	55	D	Unlikely
10	A	56	E	Unlikely
10	A	57	E	Unlikely
10	A	58	E	Unlikely
10	A	59	E	Unlikely
10	A	60	E	Unlikely
10	A	61	E	Unlikely
10	A	62	E	Unlikely
10	A	63	E	Unlikely
10	A	64	E	Unlikely
10	A	65	E	Unlikely
10	A	66	E	Unlikely
10	A	67	E	Unlikely
10	A	68	E	Unlikely
10	A	69	E	Unlikely
10	A	70	E	Unlikely
10	A	71	E	Unlikely
10	A	72	E	Unlikely
10	A	73	E	Unlikely
10	A	74	E	Unlikely
11	A	1	A	Unlikely
11	A	2	A	Unlikely
11	A	3	A	Unlikely
11	A	4	A	Unlikely
11	A	5	A	Unlikely
11	A	6	A	Unlikely
11	A	7	A	Unlikely
11	A	8	A	Unlikely
11	A	9	A	Unlikely
11	A	10	A	Unlikely
11	A	11	A	Unlikely
11	A	12	A	Unlikely
11	A	13	A	Unlikely
11	A	14	B	Unlikely
11	A	15	B	Unlikely
11	A	16	B	Unlikely
11	A	17	B	Unlikely
11	A	18	B	Unlikely
11	A	19	B	Unlikely
11	A	20	B	Unlikely
11	A	21	B	Unlikely
11	A	22	B	Unlikely
11	A	23	B	Unlikely
11	A	24	C	Unlikely
11	A	25	C	Unlikely
11	A	26	C	Unlikely
11	A	27	C	Unlikely
11	A	28	C	Unlikely
11	A	29	C	Unlikely
11	A	30	C	Unlikely
11	A	31	C	Unlikely
11	A	32	C	Unlikely
11	A	33	C	Unlikely
11	A	34	C	Unlikely
11	A	35	C	Unlikely
11	A	36	C	Unlikely
11	A	37	C	Unlikely
11	A	38	C	Unlikely
11	A	39	C	Unlikely
11	A	40	C	Unlikely
11	A	41	C	Unlikely
11	A	42	D	Unlikely
11	A	43	D	Unlikely
11	A	44	D	Unlikely
11	A	45	D	Unlikely
11	A	46	D	Unlikely
11	A	47	D	Unlikely
11	A	48	D	Unlikely
11	A	49	D	Unlikely
11	A	50	D	Unlikely
11	A	51	D	Unlikely
11	A	52	D	Unlikely
11	A	53	D	Unlikely
11	A	54	D	Unlikely
11	A	55	D	Unlikely
11	A	56	E	Unlikely
11	A	57	E	Unlikely
11	A	58	E	Unlikely
11	A	59	E	Unlikely
11	A	60	E	Unlikely
11	A	61	E	Unlikely
11	A	62	E	Unlikely
11	A	63	E	Unlikely
11	A	64	E	Unlikely
11	A	65	E	Unlikely
11	A	66	E	Unlikely
11	A	67	E	Unlikely
11	A	68	E	Unlikely
11	A	69	E	Unlikely
11	A	70	E	Unlikely
11	A	71	E	Unlikely
11	A	72	E	Unlikely
11	A	73	E	Unlikely
11	A	74	E	Unlikely
12	A	1	A	Unlikely
12	A	2	A	Unlikely
12	A	3	A	Unlikely
12	A	4	A	Unlikely
12	A	5	A	Unlikely
12	A	6	A	Unlikely
12	A	7	A	Unlikely
12	A	8	A	Unlikely
12	A	9	A	Unlikely
12	A	10	A	Unlikely
12	A	11	A	Unlikely
12	A	12	A	Unlikely
12	A	13	A	Unlikely
12	A	14	B	Unlikely
12	A	15	B	Unlikely
12	A	16	B	Unlikely
12	A	17	B	Unlikely
12	A	18	B	Unlikely
12	A	19	B	Unlikely
12	A	20	B	Unlikely
12	A	21	B	Unlikely
12	A	22	B	Unlikely
12	A	23	B	Unlikely
12	A	24	C	Unlikely
12	A	25	C	Unlikely
12	A	26	C	Unlikely
12	A	27	C	Unlikely
12	A	28	C	Unlikely
12	A	29	C	Unlikely
12	A	30	C	Unlikely
12	A	31	C	Unlikely
12	A	32	C	Unlikely
12	A	33	C	Unlikely
12	A	34	C	Unlikely
12	A	35	C	Unlikely
12	A	36	C	Unlikely
12	A	37	C	Unlikely
12	A	38	C	Unlikely
12	A	39	C	Unlikely
12	A	40	C	Unlikely
12	A	41	C	Unlikely
12	A	42	D	Unlikely
12	A	43	D	Unlikely
12	A	44	D	Unlikely
12	A	45	D	Unlikely
12	A	46	D	Unlikely
12	A	47	D	Unlikely
12	A	48	D	Unlikely
12	A	49	D	Unlikely
12	A	50	D	Unlikely
12	A	51	D	Unlikely
12	A	52	D	Unlikely
12	A	53	D	Unlikely
12	A	54	D	Unlikely
12	A	55	D	Unlikely
12	A	56	E	Unlikely
12	A	57	E	Unlikely
12	A	58	E	Unlikely
12	A	59	E	Unlikely
12	A	60	E	Unlikely
12	A	61	E	Unlikely
12	A	62	E	Unlikely
12	A	63	E	Unlikely
12	A	64	E	Unlikely
12	A	65	E	Unlikely
12	A	66	E	Unlikely
12	A	67	E	Unlikely
12	A	68	E	Unlikely
12	A	69	E	Unlikely
12	A	70	E	Unlikely
12	A	71	E	Unlikely
12	A	72	E	Unlikely
12	A	73	E	Unlikely
12	A	74	E	Unlikely
13	A	1	A	Unlikely
13	A	2	A	Unlikely
13	A	3	A	Unlikely
13	A	4	A	Unlikely
13	A	5	A	Unlikely
13	A	6	A	Unlikely
13	A	7	A	Unlikely
13	A	8	A	Unlikely
13	A	9	A	Unlikely
13	A	10	A	Unlikely
13	A	11	A	Unlikely
13	A	12	A	Unlikely
13	A	13	A	Unlikely
13	A	14	B	Unlikely
13	A	15	B	Unlikely
13	A	16	B	Unlikely
13	A	17	B	Unlikely
13	A	18	B	Unlikely
13	A	19	B	Unlikely
13	A	20	B	Unlikely
13	A	21	B	Unlikely
13	A	22	B	Unlikely
13	A	23	B	Unlikely
13	A	24	C	Unlikely
13	A	25	C	Unlikely
13	A	26	C	Unlikely
13	A	27	C	Unlikely
13	A	28	C	Unlikely
13	A	29	C	Unlikely
13	A	30	C	Unlikely
13	A	31	C	Unlikely
13	A	32	C	Unlikely
13	A	33	C	Unlikely
13	A	34	C	Unlikely
13	A	35	C	Unlikely
13	A	36	C	Unlikely
13	A	37	C	Unlikely
13	A	38	C	Unlikely
13	A	39	C	Unlikely
13	A	40	C	Unlikely
13	A	41	C	Unlikely
13	A	42	D	Unlikely
13	A	43	D	Unlikely
13	A	44	D	Unlikely
13	A	45	D	Unlikely
13	A	46	D	Unlikely
13	A	47	D	Unlikely
13	A	48	D	Unlikely
13	A	49	D	Unlikely
13	A	50	D	Unlikely
13	A	51	D	Unlikely
13	A	52	D	Unlikely
13	A	53	D	Unlikely
13	A	54	D	Unlikely
13	A	55	D	Unlikely
13	A	56	E	Unlikely
13	A	57	E	Unlikely
13	A	58	E	Unlikely
13	A	59	E	Unlikely
13	A	60	E	Unlikely
13	A	61	E	Unlikely
13	A	62	E	Unlikely
13	A	63	E	Unlikely
13	A	64	E	Unlikely
13	A	65	E	Unlikely
13	A	66	E	Unlikely
13	A	67	E	Unlikely
13	A	68	E	Unlikely
13	A	69	E	Unlikely
13	A	70	E	Unlikely
13	A	71	E	Unlikely
13	A	72	E	Unlikely
13	A	73	E	Unlikely
13	A	74	E	Unlikely
14	B	1	A	Unlikely
14	B	2	A	Unlikely
14	B	3	A	Unlikely
14	B	4	A	Unlikely
14	B	5	A	Unlikely
14	B	6	A	Unlikely
14	B	7	A	Unlikely
14	B	8	A	Unlikely
14	B	9	A	Unlikely
14	B	10	A	Unlikely
14	B	11	A	Unlikely
14	B	12	A	Unlikely
14	B	13	A	Unlikely
14	B	14	B	Unlikely
14	B	15	B	Consistent
14	B	16	B	Unlikely
14	B	17	B	Consistent
14	B	18	B	Consistent
14	B	19	B	Consistent
14	B	20	B	Consistent
14	B	21	B	Unlikely
14	B	22	B	Consistent
14	B	23	B	Consistent
14	B	24	C	Unlikely
14	B	25	C	Unlikely
14	B	26	C	Unlikely
14	B	27	C	Unlikely
14	B	28	C	Unlikely
14	B	29	C	Unlikely
14	B	30	C	Unlikely
14	B	31	C	Unlikely
14	B	32	C	Unlikely
14	B	33	C	Unlikely
14	B	34	C	Unlikely
14	B	35	C	Unlikely
14	B	36	C	Unlikely
14	B	37	C	Unlikely
14	B	38	C	Unlikely
14	B	39	C	Unlikely
14	B	40	C	Unlikely
14	B	41	C	Unlikely
14	B	42	D	Unlikely
14	B	43	D	Unlikely
14	B	44	D	Unlikely
14	B	45	D	Unlikely
14	B	46	D	Unlikely
14	B	47	D	Unlikely
14	B	48	D	Unlikely
14	B	49	D	Unlikely
14	B	50	D	Unlikely
14	B	51	D	Unlikely
14	B	52	D	Unlikely
14	B	53	D	Unlikely
14	B	54	D	Unlikely
14	B	55	D	Unlikely
14	B	56	E	Unlikely
14	B	57	E	Unlikely
14	B	58	E	Unlikely
14	B	59	E	Unlikely
14	B	60	E	Unlikely
14	B	61	E	Unlikely
14	B	62	E	Unlikely
14	B	63	E	Unlikely
14	B	64	E	Unlikely
14	B	65	E	Unlikely
14	B	66	E	Unlikely
14	B	67	E	Unlikely
14	B	68	E	Unlikely
14	B	69	E	Unlikely
14	B	70	E	Unlikely
14	B	71	E	Unlikely
14	B	72	E	Unlikely
14	B	73	E	Unlikely
14	B	74	E	Unlikely
15	B	1	A	Unlikely
15	B	2	A	Unlikely
15	B	3	A	Unlikely
15	B	4	A	Unlikely
15	B	5	A	Unlikely
15	B	6	A	Unlikely
15	B	7	A	Unlikely
15	B	8	A	Unlikely
15	B	9	A	Unlikely
15	B	10	A	Unlikely
15	B	11	A	Unlikely
15	B	12	A	Unlikely
15	B	13	A	Unlikely
15	B	14	B	Unlikely
15	B	15	B	Unlikely
15	B	16	B	Consistent
15	B	17	B	Borderline
15	B	18	B	Borderline
15	B	19	B	Consistent
15	B	20	B	Borderline
15	B	21	B	Consistent
15	B	22	B	Unlikely
15	B	23	B	Unlikely
15	B	24	C	Unlikely
15	B	25	C	Unlikely
15	B	26	C	Unlikely
15	B	27	C	Unlikely
15	B	28	C	Unlikely
15	B	29	C	Unlikely
15	B	30	C	Unlikely
15	B	31	C	Unlikely
15	B	32	C	Unlikely
15	B	33	C	Unlikely
15	B	34	C	Unlikely
15	B	35	C	Unlikely
15	B	36	C	Unlikely
15	B	37	C	Unlikely
15	B	38	C	Unlikely
15	B	39	C	Unlikely
15	B	40	C	Unlikely
15	B	41	C	Unlikely
15	B	42	D	Unlikely
15	B	43	D	Unlikely
15	B	44	D	Unlikely
15	B	45	D	Unlikely
15	B	46	D	Unlikely
15	B	47	D	Unlikely
15	B	48	D	Unlikely
15	B	49	D	Unlikely
15	B	50	D	Unlikely
15	B	51	D	Unlikely
15	B	52	D	Unlikely
15	B	53	D	Unlikely
15	B	54	D	Unlikely
15	B	55	D	Unlikely
15	B	56	E	Unlikely
15	B	57	E	Unlikely
15	B	58	E	Unlikely
15	B	59	E	Unlikely
15	B	60	E	Unlikely
15	B	61	E	Unlikely
15	B	62	E	Unlikely
15	B	63	E	Unlikely
15	B	64	E	Unlikely
15	B	65	E	Unlikely
15	B	66	E	Unlikely
15	B	67	E	Unlikely
15	B	68	E	Unlikely
15	B	69	E	Unlikely
15	B	70	E	Unlikely
15	B	71	E	Unlikely
15	B	72	E	Unlikely
15	B	73	E	Unlikely
15	B	74	E	Unlikely
16	B	1	A	Unlikely
16	B	2	A	Unlikely
16	B	3	A	Unlikely
16	B	4	A	Unlikely
16	B	5	A	Unlikely
16	B	6	A	Unlikely
16	B	7	A	Unlikely
16	B	8	A	Unlikely
16	B	9	A	Unlikely
16	B	10	A	Unlikely
16	B	11	A	Unlikely
16	B	12	A	Unlikely
16	B	13	A	Unlikely
16	B	14	B	Unlikely
16	B	15	B	Consistent
16	B	16	B	Unlikely
16	B	17	B	Unlikely
16	B	18	B	Unlikely
16	B	19	B	Unlikely
16	B	20	B	Unlikely
16	B	21	B	Consistent
16	B	22	B	Unlikely
16	B	23	B	Unlikely
16	B	24	C	Unlikely
16	B	25	C	Unlikely
16	B	26	C	Unlikely
16	B	27	C	Unlikely
16	B	28	C	Unlikely
16	B	29	C	Unlikely
16	B	30	C	Unlikely
16	B	31	C	Unlikely
16	B	32	C	Unlikely
16	B	33	C	Unlikely
16	B	34	C	Unlikely
16	B	35	C	Unlikely
16	B	36	C	Unlikely
16	B	37	C	Unlikely
16	B	38	C	Unlikely
16	B	39	C	Unlikely
16	B	40	C	Unlikely
16	B	41	C	Unlikely
16	B	42	D	Unlikely
16	B	43	D	Unlikely
16	B	44	D	Unlikely
16	B	45	D	Unlikely
16	B	46	D	Unlikely
16	B	47	D	Unlikely
16	B	48	D	Unlikely
16	B	49	D	Unlikely
16	B	50	D	Unlikely
16	B	51	D	Unlikely
16	B	52	D	Unlikely
16	B	53	D	Unlikely
16	B	54	D	Unlikely
16	B	55	D	Unlikely
16	B	56	E	Unlikely
16	B	57	E	Unlikely
16	B	58	E	Unlikely
16	B	59	E	Unlikely
16	B	60	E	Unlikely
16	B	61	E	Unlikely
16	B	62	E	Unlikely
16	B	63	E	Unlikely
16	B	64	E	Unlikely
16	B	65	E	Unlikely
16	B	66	E	Unlikely
16	B	67	E	Unlikely
16	B	68	E	Unlikely
16	B	69	E	Unlikely
16	B	70	E	Unlikely
16	B	71	E	Unlikely
16	B	72	E	Unlikely
16	B	73	E	Unlikely
16	B	74	E	Unlikely
17	B	1	A	Unlikely
17	B	2	A	Unlikely
17	B	3	A	Unlikely
17	B	4	A	Unlikely
17	B	5	A	Unlikely
17	B	6	A	Unlikely
17	B	7	A	Unlikely
17	B	8	A	Unlikely
17	B	9	A	Unlikely
17	B	10	A	Unlikely
17	B	11	A	Unlikely
17	B	12	A	Unlikely
17	B	13	A	Unlikely
17	B	14	B	Consistent
17	B	15	B	Borderline
17	B	16	B	Unlikely
17	B	17	B	Unlikely
17	B	18	B	Consistent
17	B	19	B	Borderline
17	B	20	B	Consistent
17	B	21	B	Unlikely
17	B	22	B	Consistent
17	B	23	B	Consistent
17	B	24	C	Unlikely
17	B	25	C	Unlikely
17	B	26	C	Unlikely
17	B	27	C	Unlikely
17	B	28	C	Unlikely
17	B	29	C	Unlikely
17	B	30	C	Unlikely
17	B	31	C	Unlikely
17	B	32	C	Unlikely
17	B	33	C	Unlikely
17	B	34	C	Unlikely
17	B	35	C	Unlikely
17	B	36	C	Unlikely
17	B	37	C	Unlikely
17	B	38	C	Unlikely
17	B	39	C	Unlikely
17	B	40	C	Unlikely
17	B	41	C	Unlikely
17	B	42	D	Unlikely
17	B	43	D	Unlikely
17	B	44	D	Unlikely
17	B	45	D	Unlikely
17	B	46	D	Unlikely
17	B	47	D	Unlikely
17	B	48	D	Unlikely
17	B	49	D	Unlikely
17	B	50	D	Unlikely
17	B	51	D	Unlikely
17	B	52	D	Unlikely
17	B	53	D	Unlikely
17	B	54	D	Unlikely
17	B	55	D	Unlikely
17	B	56	E	Unlikely
17	B	57	E	Unlikely
17	B	58	E	Unlikely
17	B	59	E	Unlikely
17	B	60	E	Unlikely
17	B	61	E	Unlikely
17	B	62	E	Unlikely
17	B	63	E	Unlikely
17	B	64	E	Unlikely
17	B	65	E	Unlikely
17	B	66	E	Unlikely
17	B	67	E	Unlikely
17	B	68	E	Unlikely
17	B	69	E	Unlikely
17	B	70	E	Unlikely
17	B	71	E	Unlikely
17	B	72	E	Unlikely
17	B	73	E	Unlikely
17	B	74	E	Unlikely
18	B	1	A	Unlikely
18	B	2	A	Unlikely
18	B	3	A	Unlikely
18	B	4	A	Unlikely
18	B	5	A	Unlikely
18	B	6	A	Unlikely
18	B	7	A	Unlikely
18	B	8	A	Unlikely
18	B	9	A	Unlikely
18	B	10	A	Unlikely
18	B	11	A	Unlikely
18	B	12	A	Unlikely
18	B	13	A	Unlikely
18	B	14	B	Borderline
18	B	15	B	Unlikely
18	B	16	B	Unlikely
18	B	17	B	Consistent
18	B	18	B	Unlikely
18	B	19	B	Unlikely
18	B	20	B	Consistent
18	B	21	B	Unlikely
18	B	22	B	Consistent
18	B	23	B	Consistent
18	B	24	C	Unlikely
18	B	25	C	Unlikely
18	B	26	C	Unlikely
18	B	27	C	Unlikely
18	B	28	C	Unlikely
18	B	29	C	Unlikely
18	B	30	C	Unlikely
18	B	31	C	Unlikely
18	B	32	C	Unlikely
18	B	33	C	Unlikely
18	B	34	C	Unlikely
18	B	35	C	Unlikely
18	B	36	C	Unlikely
18	B	37	C	Unlikely
18	B	38	C	Unlikely
18	B	39	C	Unlikely
18	B	40	C	Unlikely
18	B	41	C	Unlikely
18	B	42	D	Unlikely
18	B	43	D	Unlikely
18	B	44	D	Unlikely
18	B	45	D	Unlikely
18	B	46	D	Unlikely
18	B	47	D	Unlikely
18	B	48	D	Unlikely
18	B	49	D	Unlikely
18	B	50	D	Unlikely
18	B	51	D	Unlikely
18	B	52	D	Unlikely
18	B	53	D	Unlikely
18	B	54	D	Unlikely
18	B	55	D	Unlikely
18	B	56	E	Unlikely
18	B	57	E	Unlikely
18	B	58	E	Unlikely
18	B	59	E	Unlikely
18	B	60	E	Unlikely
18	B	61	E	Unlikely
18	B	62	E	Unlikely
18	B	63	E	Unlikely
18	B	64	E	Unlikely
18	B	65	E	Unlikely
18	B	66	E	Unlikely
18	B	67	E	Unlikely
18	B	68	E	Unlikely
18	B	69	E	Unlikely
18	B	70	E	Unlikely
18	B	71	E	Unlikely
18	B	72	E	Unlikely
18	B	73	E	Unlikely
18	B	74	E	Unlikely
19	B	1	A	Unlikely
19	B	2	A	Unlikely
19	B	3	A	Unlikely
19	B	4	A	Unlikely
19	B	5	A	Unlikely
19	B	6	A	Unlikely
19	B	7	A	Unlikely
19	B	8	A	Unlikely
19	B	9	A	Unlikely
19	B	10	A	Unlikely
19	B	11	A	Unlikely
19	B	12	A	Unlikely
19	B	13	A	Unlikely
19	B	14	B	Consistent
19	B	15	B	Consistent
19	B	16	B	Unlikely
19	B	17	B	Consistent
19	B	18	B	Borderline
19	B	19	B	Unlikely
19	B	20	B	Consistent
19	B	21	B	Unlikely
19	B	22	B	Borderline
19	B	23	B	Unlikely
19	B	24	C	Unlikely
19	B	25	C	Unlikely
19	B	26	C	Unlikely
19	B	27	C	Unlikely
19	B	28	C	Unlikely
19	B	29	C	Unlikely
19	B	30	C	Unlikely
19	B	31	C	Unlikely
19	B	32	C	Unlikely
19	B	33	C	Unlikely
19	B	34	C	Unlikely
19	B	35	C	Unlikely
19	B	36	C	Unlikely
19	B	37	C	Unlikely
19	B	38	C	Unlikely
19	B	39	C	Unlikely
19	B	40	C	Unlikely
19	B	41	C	Unlikely
19	B	42	D	Unlikely
19	B	43	D	Unlikely
19	B	44	D	Unlikely
19	B	45	D	Unlikely
19	B	46	D	Unlikely
19	B	47	D	Unlikely
19	B	48	D	Unlikely
19	B	49	D	Unlikely
19	B	50	D	Unlikely
19	B	51	D	Unlikely
19	B	52	D	Unlikely
19	B	53	D	Unlikely
19	B	54	D	Unlikely
19	B	55	D	Unlikely
19	B	56	E	Unlikely
19	B	57	E	Unlikely
19	B	58	E	Unlikely
19	B	59	E	Unlikely
19	B	60	E	Unlikely
19	B	61	E	Unlikely
19	B	62	E	Unlikely
19	B	63	E	Unlikely
19	B	64	E	Unlikely
19	B	65	E	Unlikely
19	B	66	E	Unlikely
19	B	67	E	Unlikely
19	B	68	E	Unlikely
19	B	69	E	Unlikely
19	B	70	E	Unlikely
19	B	71	E	Unlikely
19	B	72	E	Unlikely
19	B	73	E	Unlikely
19	B	74	E	Unlikely
20	B	1	A	Unlikely
20	B	2	A	Unlikely
20	B	3	A	Unlikely
20	B	4	A	Unlikely
20	B	5	A	Unlikely
20	B	6	A	Unlikely
20	B	7	A	Unlikely
20	B	8	A	Unlikely
20	B	9	A	Unlikely
20	B	10	A	Unlikely
20	B	11	A	Unlikely
20	B	12	A	Unlikely
20	B	13	A	Unlikely
20	B	14	B	Borderline
20	B	15	B	Unlikely
20	B	16	B	Unlikely
20	B	17	B	Consistent
20	B	18	B	Consistent
20	B	19	B	Unlikely
20	B	20	B	Unlikely
20	B	21	B	Unlikely
20	B	22	B	Consistent
20	B	23	B	Consistent
20	B	24	C	Unlikely
20	B	25	C	Unlikely
20	B	26	C	Unlikely
20	B	27	C	Unlikely
20	B	28	C	Unlikely
20	B	29	C	Unlikely
20	B	30	C	Unlikely
20	B	31	C	Unlikely
20	B	32	C	Unlikely
20	B	33	C	Unlikely
20	B	34	C	Unlikely
20	B	35	C	Unlikely
20	B	36	C	Unlikely
20	B	37	C	Unlikely
20	B	38	C	Unlikely
20	B	39	C	Unlikely
20	B	40	C	Unlikely
20	B	41	C	Unlikely
20	B	42	D	Unlikely
20	B	43	D	Unlikely
20	B	44	D	Unlikely
20	B	45	D	Unlikely
20	B	46	D	Unlikely
20	B	47	D	Unlikely
20	B	48	D	Unlikely
20	B	49	D	Unlikely
20	B	50	D	Unlikely
20	B	51	D	Unlikely
20	B	52	D	Unlikely
20	B	53	D	Unlikely
20	B	54	D	Unlikely
20	B	55	D	Unlikely
20	B	56	E	Unlikely
20	B	57	E	Unlikely
20	B	58	E	Unlikely
20	B	59	E	Unlikely
20	B	60	E	Unlikely
20	B	61	E	Unlikely
20	B	62	E	Unlikely
20	B	63	E	Unlikely
20	B	64	E	Unlikely
20	B	65	E	Unlikely
20	B	66	E	Unlikely
20	B	67	E	Unlikely
20	B	68	E	Unlikely
20	B	69	E	Unlikely
20	B	70	E	Unlikely
20	B	71	E	Unlikely
20	B	72	E	Unlikely
20	B	73	E	Unlikely
20	B	74	E	Unlikely
21	B	1	A	Unlikely
21	B	2	A	Unlikely
21	B	3	A	Unlikely
21	B	4	A	Unlikely
21	B	5	A	Unlikely
21	B	6	A	Unlikely
21	B	7	A	Unlikely
21	B	8	A	Unlikely
21	B	9	A	Unlikely
21	B	10	A	Unlikely
21	B	11	A	Unlikely
21	B	12	A	Unlikely
21	B	13	A	Unlikely
21	B	14	B	Unlikely
21	B	15	B	Consistent
21	B	16	B	Consistent
21	B	17	B	Unlikely
21	B	18	B	Unlikely
21	B	19	B	Unlikely
21	B	20	B	Unlikely
21	B	21	B	Unlikely
21	B	22	B	Unlikely
21	B	23	B	Unlikely
21	B	24	C	Unlikely
21	B	25	C	Unlikely
21	B	26	C	Unlikely
21	B	27	C	Unlikely
21	B	28	C	Unlikely
21	B	29	C	Unlikely
21	B	30	C	Unlikely
21	B	31	C	Unlikely
21	B	32	C	Unlikely
21	B	33	C	Unlikely
21	B	34	C	Unlikely
21	B	35	C	Unlikely
21	B	36	C	Unlikely
21	B	37	C	Unlikely
21	B	38	C	Unlikely
21	B	39	C	Unlikely
21	B	40	C	Unlikely
21	B	41	C	Unlikely
21	B	42	D	Unlikely
21	B	43	D	Unlikely
21	B	44	D	Unlikely
21	B	45	D	Unlikely
21	B	46	D	Unlikely
21	B	47	D	Unlikely
21	B	48	D	Unlikely
21	B	49	D	Unlikely
21	B	50	D	Unlikely
21	B	51	D	Unlikely
21	B	52	D	Unlikely
21	B	53	D	Unlikely
21	B	54	D	Unlikely
21	B	55	D	Unlikely
21	B	56	E	Unlikely
21	B	57	E	Unlikely
21	B	58	E	Unlikely
21	B	59	E	Unlikely
21	B	60	E	Unlikely
21	B	61	E	Unlikely
21	B	62	E	Unlikely
21	B	63	E	Unlikely
21	B	64	E	Unlikely
21	B	65	E	Unlikely
21	B	66	E	Unlikely
21	B	67	E	Unlikely
21	B	68	E	Unlikely
21	B	69	E	Unlikely
21	B	70	E	Unlikely
21	B	71	E	Unlikely
21	B	72	E	Unlikely
21	B	73	E	Unlikely
21	B	74	E	Unlikely
22	B	1	A	Unlikely
22	B	2	A	Unlikely
22	B	3	A	Unlikely
22	B	4	A	Unlikely
22	B	5	A	Unlikely
22	B	6	A	Unlikely
22	B	7	A	Unlikely
22	B	8	A	Unlikely
22	B	9	A	Unlikely
22	B	10	A	Unlikely
22	B	11	A	Unlikely
22	B	12	A	Unlikely
22	B	13	A	Unlikely
22	B	14	B	Unlikely
22	B	15	B	Unlikely
22	B	16	B	Unlikely
22	B	17	B	Borderline
22	B	18	B	Borderline
22	B	19	B	Unlikely
22	B	20	B	Borderline
22	B	21	B	Unlikely
22	B	22	B	Unlikely
22	B	23	B	Unlikely
22	B	24	C	Unlikely
22	B	25	C	Unlikely
22	B	26	C	Unlikely
22	B	27	C	Unlikely
22	B	28	C	Unlikely
22	B	29	C	Unlikely
22	B	30	C	Unlikely
22	B	31	C	Unlikely
22	B	32	C	Unlikely
22	B	33	C	Unlikely
22	B	34	C	Unlikely
22	B	35	C	Unlikely
22	B	36	C	Unlikely
22	B	37	C	Unlikely
22	B	38	C	Unlikely
22	B	39	C	Unlikely
22	B	40	C	Unlikely
22	B	41	C	Unlikely
22	B	42	D	Unlikely
22	B	43	D	Unlikely
22	B	44	D	Unlikely
22	B	45	D	Unlikely
22	B	46	D	Unlikely
22	B	47	D	Unlikely
22	B	48	D	Unlikely
22	B	49	D	Unlikely
22	B	50	D	Unlikely
22	B	51	D	Unlikely
22	B	52	D	Unlikely
22	B	53	D	Unlikely
22	B	54	D	Unlikely
22	B	55	D	Unlikely
22	B	56	E	Unlikely
22	B	57	E	Unlikely
22	B	58	E	Unlikely
22	B	59	E	Unlikely
22	B	60	E	Unlikely
22	B	61	E	Unlikely
22	B	62	E	Unlikely
22	B	63	E	Unlikely
22	B	64	E	Unlikely
22	B	65	E	Unlikely
22	B	66	E	Unlikely
22	B	67	E	Unlikely
22	B	68	E	Unlikely
22	B	69	E	Unlikely
22	B	70	E	Unlikely
22	B	71	E	Unlikely
22	B	72	E	Unlikely
22	B	73	E	Unlikely
22	B	74	E	Unlikely
23	B	1	A	Unlikely
23	B	2	A	Unlikely
23	B	3	A	Unlikely
23	B	4	A	Unlikely
23	B	5	A	Unlikely
23	B	6	A	Unlikely
23	B	7	A	Unlikely
23	B	8	A	Unlikely
23	B	9	A	Unlikely
23	B	10	A	Unlikely
23	B	11	A	Unlikely
23	B	12	A	Unlikely
23	B	13	A	Unlikely
23	B	14	B	Unlikely
23	B	15	B	Unlikely
23	B	16	B	Unlikely
23	B	17	B	Unlikely
23	B	18	B	Borderline
23	B	19	B	Unlikely
23	B	20	B	Consistent
23	B	21	B	Unlikely
23	B	22	B	Unlikely
23	B	23	B	Unlikely
23	B	24	C	Unlikely
23	B	25	C	Unlikely
23	B	26	C	Unlikely
23	B	27	C	Unlikely
23	B	28	C	Unlikely
23	B	29	C	Unlikely
23	B	30	C	Unlikely
23	B	31	C	Unlikely
23	B	32	C	Unlikely
23	B	33	C	Unlikely
23	B	34	C	Unlikely
23	B	35	C	Unlikely
23	B	36	C	Unlikely
23	B	37	C	Unlikely
23	B	38	C	Unlikely
23	B	39	C	Unlikely
23	B	40	C	Unlikely
23	B	41	C	Unlikely
23	B	42	D	Unlikely
23	B	43	D	Unlikely
23	B	44	D	Unlikely
23	B	45	D	Unlikely
23	B	46	D	Unlikely
23	B	47	D	Unlikely
23	B	48	D	Unlikely
23	B	49	D	Unlikely
23	B	50	D	Unlikely
23	B	51	D	Unlikely
23	B	52	D	Unlikely
23	B	53	D	Unlikely
23	B	54	D	Unlikely
23	B	55	D	Unlikely
23	B	56	E	Unlikely
23	B	57	E	Unlikely
23	B	58	E	Unlikely
23	B	59	E	Unlikely
23	B	60	E	Unlikely
23	B	61	E	Unlikely
23	B	62	E	Unlikely
23	B	63	E	Unlikely
23	B	64	E	Unlikely
23	B	65	E	Unlikely
23	B	66	E	Unlikely
23	B	67	E	Unlikely
23	B	68	E	Unlikely
23	B	69	E	Unlikely
23	B	70	E	Unlikely
23	B	71	E	Unlikely
23	B	72	E	Unlikely
23	B	73	E	Unlikely
23	B	74	E	Unlikely
24	C	1	A	Unlikely
24	C	2	A	Unlikely
24	C	3	A	Unlikely
24	C	4	A	Unlikely
24	C	5	A	Unlikely
24	C	6	A	Unlikely
24	C	7	A	Unlikely
24	C	8	A	Unlikely
24	C	9	A	Unlikely
24	C	10	A	Unlikely
24	C	11	A	Unlikely
24	C	12	A	Unlikely
24	C	13	A	Unlikely
24	C	14	B	Unlikely
24	C	15	B	Unlikely
24	C	16	B	Unlikely
24	C	17	B	Unlikely
24	C	18	B	Unlikely
24	C	19	B	Unlikely
24	C	20	B	Unlikely
24	C	21	B	Unlikely
24	C	22	B	Unlikely
24	C	23	B	Unlikely
24	C	24	C	Unlikely
24	C	25	C	Unlikely
24	C	26	C	Unlikely
24	C	27	C	Unlikely
24	C	28	C	Unlikely
24	C	29	C	Unlikely
24	C	30	C	Borderline
24	C	31	C	Unlikely
24	C	32	C	Unlikely
24	C	33	C	Unlikely
24	C	34	C	Unlikely
24	C	35	C	Unlikely
24	C	36	C	Unlikely
24	C	37	C	Unlikely
24	C	38	C	Borderline
24	C	39	C	Unlikely
24	C	40	C	Borderline
24	C	41	C	Unlikely
24	C	42	D	Unlikely
24	C	43	D	Unlikely
24	C	44	D	Unlikely
24	C	45	D	Unlikely
24	C	46	D	Unlikely
24	C	47	D	Unlikely
24	C	48	D	Unlikely
24	C	49	D	Unlikely
24	C	50	D	Unlikely
24	C	51	D	Unlikely
24	C	52	D	Unlikely
24	C	53	D	Unlikely
24	C	54	D	Unlikely
24	C	55	D	Unlikely
24	C	56	E	Unlikely
24	C	57	E	Unlikely
24	C	58	E	Unlikely
24	C	59	E	Unlikely
24	C	60	E	Unlikely
24	C	61	E	Unlikely
24	C	62	E	Unlikely
24	C	63	E	Unlikely
24	C	64	E	Unlikely
24	C	65	E	Unlikely
24	C	66	E	Unlikely
24	C	67	E	Unlikely
24	C	68	E	Unlikely
24	C	69	E	Unlikely
24	C	70	E	Unlikely
24	C	71	E	Unlikely
24	C	72	E	Unlikely
24	C	73	E	Unlikely
24	C	74	E	Unlikely
25	C	1	A	Unlikely
25	C	2	A	Unlikely
25	C	3	A	Unlikely
25	C	4	A	Unlikely
25	C	5	A	Unlikely
25	C	6	A	Unlikely
25	C	7	A	Unlikely
25	C	8	A	Unlikely
25	C	9	A	Unlikely
25	C	10	A	Unlikely
25	C	11	A	Unlikely
25	C	12	A	Unlikely
25	C	13	A	Unlikely
25	C	14	B	Unlikely
25	C	15	B	Unlikely
25	C	16	B	Unlikely
25	C	17	B	Unlikely
25	C	18	B	Unlikely
25	C	19	B	Unlikely
25	C	20	B	Unlikely
25	C	21	B	Unlikely
25	C	22	B	Unlikely
25	C	23	B	Unlikely
25	C	24	C	Unlikely
25	C	25	C	Unlikely
25	C	26	C	Unlikely
25	C	27	C	Unlikely
25	C	28	C	Unlikely
25	C	29	C	Unlikely
25	C	30	C	Unlikely
25	C	31	C	Unlikely
25	C	32	C	Unlikely
25	C	33	C	Unlikely
25	C	34	C	Unlikely
25	C	35	C	Unlikely
25	C	36	C	Unlikely
25	C	37	C	Unlikely
25	C	38	C	Unlikely
25	C	39	C	Unlikely
25	C	40	C	Unlikely
25	C	41	C	Unlikely
25	C	42	D	Unlikely
25	C	43	D	Unlikely
25	C	44	D	Unlikely
25	C	45	D	Unlikely
25	C	46	D	Unlikely
25	C	47	D	Unlikely
25	C	48	D	Unlikely
25	C	49	D	Unlikely
25	C	50	D	Unlikely
25	C	51	D	Unlikely
25	C	52	D	Unlikely
25	C	53	D	Unlikely
25	C	54	D	Unlikely
25	C	55	D	Unlikely
25	C	56	E	Unlikely
25	C	57	E	Unlikely
25	C	58	E	Unlikely
25	C	59	E	Unlikely
25	C	60	E	Unlikely
25	C	61	E	Unlikely
25	C	62	E	Unlikely
25	C	63	E	Unlikely
25	C	64	E	Unlikely
25	C	65	E	Unlikely
25	C	66	E	Unlikely
25	C	67	E	Unlikely
25	C	68	E	Unlikely
25	C	69	E	Unlikely
25	C	70	E	Unlikely
25	C	71	E	Unlikely
25	C	72	E	Unlikely
25	C	73	E	Unlikely
25	C	74	E	Unlikely
26	C	1	A	Unlikely
26	C	2	A	Unlikely
26	C	3	A	Unlikely
26	C	4	A	Unlikely
26	C	5	A	Unlikely
26	C	6	A	Unlikely
26	C	7	A	Unlikely
26	C	8	A	Unlikely
26	C	9	A	Unlikely
26	C	10	A	Unlikely
26	C	11	A	Unlikely
26	C	12	A	Unlikely
26	C	13	A	Unlikely
26	C	14	B	Unlikely
26	C	15	B	Unlikely
26	C	16	B	Unlikely
26	C	17	B	Unlikely
26	C	18	B	Unlikely
26	C	19	B	Unlikely
26	C	20	B	Unlikely
26	C	21	B	Unlikely
26	C	22	B	Unlikely
26	C	23	B	Unlikely
26	C	24	C	Unlikely
26	C	25	C	Unlikely
26	C	26	C	Unlikely
26	C	27	C	Borderline
26	C	28	C	Unlikely
26	C	29	C	Consistent
26	C	30	C	Consistent
26	C	31	C	Consistent
26	C	32	C	Consistent
26	C	33	C	Unlikely
26	C	34	C	Unlikely
26	C	35	C	Unlikely
26	C	36	C	Unlikely
26	C	37	C	Unlikely
26	C	38	C	Unlikely
26	C	39	C	Unlikely
26	C	40	C	Unlikely
26	C	41	C	Unlikely
26	C	42	D	Unlikely
26	C	43	D	Unlikely
26	C	44	D	Unlikely
26	C	45	D	Unlikely
26	C	46	D	Unlikely
26	C	47	D	Unlikely
26	C	48	D	Unlikely
26	C	49	D	Unlikely
26	C	50	D	Unlikely
26	C	51	D	Unlikely
26	C	52	D	Unlikely
26	C	53	D	Unlikely
26	C	54	D	Unlikely
26	C	55	D	Unlikely
26	C	56	E	Unlikely
26	C	57	E	Unlikely
26	C	58	E	Unlikely
26	C	59	E	Unlikely
26	C	60	E	Unlikely
26	C	61	E	Unlikely
26	C	62	E	Unlikely
26	C	63	E	Unlikely
26	C	64	E	Unlikely
26	C	65	E	Unlikely
26	C	66	E	Unlikely
26	C	67	E	Unlikely
26	C	68	E	Unlikely
26	C	69	E	Unlikely
26	C	70	E	Unlikely
26	C	71	E	Unlikely
26	C	72	E	Unlikely
26	C	73	E	Unlikely
26	C	74	E	Unlikely
27	C	1	A	Unlikely
27	C	2	A	Unlikely
27	C	3	A	Unlikely
27	C	4	A	Unlikely
27	C	5	A	Unlikely
27	C	6	A	Unlikely
27	C	7	A	Unlikely
27	C	8	A	Unlikely
27	C	9	A	Unlikely
27	C	10	A	Unlikely
27	C	11	A	Unlikely
27	C	12	A	Unlikely
27	C	13	A	Unlikely
27	C	14	B	Unlikely
27	C	15	B	Unlikely
27	C	16	B	Unlikely
27	C	17	B	Unlikely
27	C	18	B	Unlikely
27	C	19	B	Unlikely
27	C	20	B	Unlikely
27	C	21	B	Unlikely
27	C	22	B	Unlikely
27	C	23	B	Unlikely
27	C	24	C	Unlikely
27	C	25	C	Unlikely
27	C	26	C	Borderline
27	C	27	C	Unlikely
27	C	28	C	Unlikely
27	C	29	C	Borderline
27	C	30	C	Borderline
27	C	31	C	Borderline
27	C	32	C	Borderline
27	C	33	C	Unlikely
27	C	34	C	Unlikely
27	C	35	C	Unlikely
27	C	36	C	Unlikely
27	C	37	C	Unlikely
27	C	38	C	Unlikely
27	C	39	C	Unlikely
27	C	40	C	Unlikely
27	C	41	C	Unlikely
27	C	42	D	Unlikely
27	C	43	D	Unlikely
27	C	44	D	Unlikely
27	C	45	D	Unlikely
27	C	46	D	Unlikely
27	C	47	D	Unlikely
27	C	48	D	Unlikely
27	C	49	D	Unlikely
27	C	50	D	Unlikely
27	C	51	D	Unlikely
27	C	52	D	Unlikely
27	C	53	D	Unlikely
27	C	54	D	Unlikely
27	C	55	D	Unlikely
27	C	56	E	Unlikely
27	C	57	E	Unlikely
27	C	58	E	Unlikely
27	C	59	E	Unlikely
27	C	60	E	Unlikely
27	C	61	E	Unlikely
27	C	62	E	Unlikely
27	C	63	E	Unlikely
27	C	64	E	Unlikely
27	C	65	E	Unlikely
27	C	66	E	Unlikely
27	C	67	E	Unlikely
27	C	68	E	Unlikely
27	C	69	E	Unlikely
27	C	70	E	Unlikely
27	C	71	E	Unlikely
27	C	72	E	Unlikely
27	C	73	E	Unlikely
27	C	74	E	Unlikely
28	C	1	A	Unlikely
[truncated: 3,477 more rows]
