# Supplementary material for: Superspreaders drive the largest outbreaks of hospital onset COVID-19 infections
Source: eLife. 2021 Aug 24;10:e67308. doi: 10.7554/eLife.67308 (PMC8384420; doi:10.7554/eLife.67308)
Supplement: Figure 2—figure supplement 2—source data 1. [file elife-67308-fig2-figsupp2-data1.xlsx]

## Sheet: Ward A
							To
		A0	A1	A2	A3	A4	A5	A6	A7	A8	A9	A10	A11	A12
	A0	0	0	0	0.000157156	0	0	0	0	0	8.09698e-05	0	1.63748e-05	0
	A1	0	0	0.00995094	0	0	0	0.991238	0.0239569	0	0	2.06617e-05	0.0029403	0
	A2	0.022124	0	0	0.0486486	0.0355152	0	0.00132233	0.0590031	0	0.0362046	0.15063	0.0198377	0
	A3	0.00203128	0	0.00311715	0	0.00149832	0	4.71703*10^-7	0.0030223	0	0.00371303	0.0201801	0.0013808	0
	A4	0.0374411	0	0.0884704	0.0919677	0	0	4.14154e-05	0.0649323	0	0.0495898	0.208727	0.0319045	0
From	A5	0	0	0	0	0	0	0	0	0	0	0	0	0
	A6	0.133395	0	0.726411	0.308595	0.872234	0	0	0.834861	0	0.0985184	0.41121	0.120382	0
	A7	0.0453455	0	0.114395	0.103173	0.0759256	0	0.00739827	0	0	0.0564756	0.204549	0.0244121	0
	A8	0	0	0	0	0	0	0	0	0	0	0	0	0
	A9	8.07865e-05	0	9.89894e-05	0.000256635	0	0	0	0	0	0	0	1.30705e-05	0
	A10	0.759045	0	0.0567484	0.445487	0.0144796	0	2.22397*10^-11	0.0138842	1	0.754798	0	0.799113	0
	A11	0.000536902	0	0.000808936	0.00171565	0.000347587	0	0	0.000339736	0	0.000619456	0.00468301	0	0
	A12	0	0	0	0	0	0	0	0	0	0	0	0	0

## Sheet: Ward B
						To
		B0	B1	B2	B3	B4	B5	B6	B7	B8	B9
	B0	0	0.243412	0.00151406	0.709851	0.331816	0.913275	0	0.786198	0	0.314703
	B1	0	0	0	0	0	0	0	5.61857*10^-10	0	2.9323*10^-7
	B2	0.000131765	0	0	0.00164745	0.0016757	0.00139091	0	0.00166608	0	0.00161008
	B3	0	0	0	0	0	0.00114431	0	0.00261589	0	0.00153834
From	B4	0	0	2.23962*10^-6	0	0	1.71614*10^-6	0.970548	0.00197992	0.85531	0.53215
	B5	0.0319033	0.509622	0.000161638	0.210847	0.666508	0	0	0.192768	0	0.120814
	B6	0	0	0	0	0	0	0	0	0.14469	0
	B7	0.00248915	0.173673	0	0.0626438	0	0.0431675	0	0	0	0.0279439
	B8	0	0	0	0	0	0	0.0294518	0	0	0
	B9	0.00124341	0.0716151	0	0.0150109	0	0.00898297	0	0.0122835	0	0

## Sheet: Ward C
											To
		C0	C1	C2	C3	C4	C5	C6	C7	C8	C9	C10	C11	C12	C13	C14	C15	C16	C17
	C0	0	0	6.48357*10^-8	0	0.990822	0	0	0	0	0	0	0	0.00917789	0	0	0	0	0
	C1	0	0	0	0	0	0	0	0	0	0	0	1	0	0	0	0	0	0
	C2	0	0	0	0	0	0	0	0	0.0184591	0	0.0911093	0	0.00786051	0	0	0	0	0
	C3	0	0	0	0	0	1	0	0	0	0	0	0	0	0	0	0	0	0
	C4	0	0	0.266314	0	0	0	0	0	0.0164313	0	0.072022	0	0.965285	0	0	0	0	0
	C5	0	0	0	0	0	0	0	0	0	0	0	0	0	0	0	0	0	0
	C6	0	0	0	0	0	0	0	0	0	0	0	0	0	0	0	0	0	0
	C7	0	0	0	0	0	0	0	0	0	0	0	0	0	0	0	0	0	0
From	C8	0	0	0.048984	0	0	0	0	0	0	0	0.218869	0	0.00143166	0	0	0	0	0
	C9	0	0	0	0	0	0	0	0	0	0	0	0	0	0	0	0	0	0
	C10	0	0	0.197805	0	0	0	0	0	0.781131	0	0	0	0.0162445	0	0	0	0	0
	C11	0	0	0	0	0	0	1	1	0	0	0	0	0	0	0	0	1	0
	C12	0	0	0.486898	0	0.00917796	0	0	0	0.183979	0	0.617999	0	0	0	0	0	0	0
	C13	0	0	0	0	0	0	0	0	0	0	0	0	0	0	0	0	0	0
	C14	0	0	0	0	0	0	0	0	0	0	0	0	0	0	0	0	0	0
	C15	0	0	0	0	0	0	0	0	0	0	0	0	0	0	0	0	0	0
	C16	0	0	0	0	0	0	0	0	0	0	0	0	0	0	0	0	0	0
	C17	0	0	0	0	0	0	0	0	0	0	0	0	0	0	0	0	0	0

## Sheet: Ward D
								To
		D0	D1	D2	D3	D4	D5	D6	D7	D8	D9	D10	D11	D12	D13
	D0	0	0.499968	0.304724	0	0.506365	0	0.0240582	0	0	0	0	0	0.0317699	0
	D1	0.500032	0	0.297342	0	0.487525	0	0.0265046	0	0	0	0	0	0.0298098	0
	D2	0	0	0	0	0.00576081	0	0.00348733	0	0	0	0	0	0.00314197	0
	D3	0	0	0	0	0	0.516869	0	0	0.483131	0	0	0	0	0
	D4	0	0	0.397934	0	0	0	0.945362	0	0	0	0	0	0.915436	0
	D5	0	0	0	0	0	0	0	0	0	0	0.516869	0	0	0
From	D6	0	0	0	0	0.000349502	0	0	0	0	0	0	0	0.0198421	0
	D7	0	0	0	0	0	0	0	0	0	0	0	0	0	0
	D8	0	0	0	0	0	0	0	0	0	0.483131	0	0	0	0
	D9	0	0	0	0	0	0	0	0	0	0	0	0	0	0
	D10	0	0	0	0	0	0	0	0	0	0	0	0	0	0
	D11	0	0	0	0	0	0	0	0	0	0	0	0	0	0
	D12	0	0	0	0	0	0	0.000587425	0	0	0	0	0	0	0
	D13	0	0	0	0	0	0	0	0	0	0	0	0	0	0

## Sheet: Ward E
											To
		E0	E1	E2	E3	E4	E5	E6	E7	E8	E9	E10	E11	E12	E13	E14	E15	E16	E17	E18
	E0	0	0	0	0	0	0	0	0	0	0	0	0	0	0	0	0	0	0	0
	E1	0	0	0	0	0	0	0	0	0	0	0	0	0	0	0	0	0	0	1
	E2	0	0	0	0	0	0	0	0	0	0	0	0	0	0	0	0	0	0	0
	E3	0	0	0	0	0	0	0	0	0	0	0	0	0	0	0	0	0	0	0
	E4	0	0	0	0	0	0	0	0	0	0	0	0	0	0	0	0	0	0	0
	E5	0	0	0	0	0	0	0	0	0	0	0	0	0	0	0	0	0	0	0
	E6	0	0	0	0	0	0	0	0	0	0	0	0	0.00886904	0	0	0	0	0	0
	E7	0	0	0	0	0	0	0	0	0	0	0	0	0	0	0	0	0	0	0
From	E8	0	0	0	0	0	0	0	0	0	0	0	0	0	0	0	0	0	1	0
	E9	0	0	0	0	0	0	0	0	0	0	0	0	0	0	0	0	0	0	0
	E10	0	0	0	0	0	0	0	0	0	0	0	0	0	0	0	0	0	0	0
	E11	0	0	0	0	0	0	0	0	0	0	0	0	0	0	0	0	0	0	0
	E12	0	0	0	0	0	0	0.991131	0	0	0	0	0	0	0	0	0	0	0	0
	E13	0	0	0	0	0	0	0	0	0	0	0	0	0	0	1	1	0	0	0
	E14	0	0	0	0	0	0	0	0	0	0	0	0	0	0	0	0	0	0	0
	E15	0	0	0	0	0	0	0	0	0	0	0	0	0	0	0	0	0	0	0
	E16	0	0	0	0	0	0	0	0	0	0	0	0	0	0	0	0	0	0	0
	E17	0	0	0	0	0	0	0	0	0	0	0	0	0	0	0	0	0	0	0
	E18	0	0	0	0	0	0	0	0	0	0	0	0	0	0	0	0	0	0	0
