# Supplementary material for: Superspreaders drive the largest outbreaks of hospital onset COVID-19 infections
Source: eLife. 2021 Aug 24;10:e67308. doi: 10.7554/eLife.67308 (PMC8384420; doi:10.7554/eLife.67308)
Supplement: Figure 4—figure supplement 1—source data 1. [file elife-67308-fig4-figsupp1-data1.xlsx]

## Sheet: Ward A
				P(transmit to n individuals)
	0	1	2	3	4	5	6	7	8
A0	0.999746	0.000254258	1.21284e-07	1.07298e-12	0	0	0	0	0
A1	0	0.972084	0.0277258	0.00018989	2.48388e-07	1.59205e-12	0	0	0
A2	0.696304	0.240393	0.0570372	0.00624315	2.18622e-05	1.10593e-07	3.00196e-08	1.25264e-08	0
A3	0.966365	0.0323261	0.00130778	5.56511e-07	3.53805e-08	1.07887e-11	0	0	0
A4	0.577708	0.290598	0.112613	0.0190739	7.29336e-06	1.04901e-08	0	0	0
A5	1	0	0	0	0	0	0	0	0
A6	0.000201361	0.0287232	0.167196	0.316004	0.294622	0.14878	0.0392246	0.00524919	0
A7	0.583084	0.254819	0.118693	0.0349205	0.00771381	0.000769312	1.01457e-06	0	0
A8	1	0	0	0	0	0	0	0	0
A9	0.999552	0.000446711	1.38529e-06	3.90279e-11	1.13516e-12	0	0	0	0
A10	0	8.15357e-05	0.0459962	0.333062	0.401975	0.178154	0.0328849	0.00645519	0.00139115
A11	0.991223	0.00850252	0.000273348	6.70013e-07	1.08555e-08	1.50565e-10	5.85851e-12	0	0
A12	1	0	0	0	0	0	0	0	0

## Sheet: Ward B
				P(transmit to n individuals)
	0	1	2	3	4	5	6
B0	0.00322073	0.0479374	0.175882	0.357633	0.271448	0.120895	0.0229834
B1	1	2.93771e-07	1.05103e-11	0	0	0	0
B2	0.998324	1.44104e-09	3.18374e-06	3.2416e-05	0.000182125	0.00145797	0
B3	0.994722	0.00525772	2.03633e-05	3.02089e-08	0	0	0
B4	0	0.0760827	0.487982	0.4358	0.000133052	8.61612e-07	1.20412e-06
B5	0.143323	0.266775	0.371931	0.158692	0.0509337	0.0078972	0.000448259
B6	0.85531	0.14469	0	0	0	0	0
B7	0.729387	0.23546	0.0312198	0.00371948	0.000210631	3.42041e-06	0
B8	0.970548	0.0294518	0	0	0	0	0
B9	0.899679	0.0922426	0.00737939	0.000663894	3.49851e-05	5.73211e-07	0

## Sheet: Ward C
		P(transmit to n individuals)
	0	1	2	3
C0	0	1	0	0
C1	0	1	0	0
C2	0.884742	0.113088	0.00217053	0
C3	0	1	0	0
C4	0.00696635	0.704701	0.249646	0.0386863
C5	1	0	0	0
C6	1	0	0	0
C7	1	0	0	0
C8	0.781131	0.169432	0.0484589	0.000978351
C9	1	0	0	0
C10	0.218869	0.578904	0.190404	0.0118226
C11	0	0	0	1
C13	1	0	0	0
C14	1	0	0	0
C15	1	0	0	0
C16	1	0	0	0
C17	1	0	0	0

## Sheet: Ward D
			P(transmit to n individuals)
	0	1	2	3	4	5
D0	0.17488	0.397979	0.318961	0.10187	0.00617533	0.000134234
D1	0.181029	0.403941	0.313507	0.0959511	0.00545109	0.000119987
D2	0.987811	0.0119893	0.000198644	1.18349e-06	0	0
D3	0	1	0	0	0	0
D4	0.0043935	0.0816189	0.564849	0.349138	0	0
D5	0.483131	0.516869	0	0	0	0
D6	0.979865	0.0200782	5.67235e-05	0	0	0
D7	1	0	0	0	0	0
D8	0.516869	0.483131	0	0	0	0
D9	1	0	0	0	0	0
D10	1	0	0	0	0	0
D11	1	0	0	0	0	0
D12	0.999413	0.000587425	0	0	0	0
D13	1	0	0	0	0	0

## Sheet: Model fits
			Probability
	Number infected	Data	Poisson model	Neg. binomial model
	0	0.64399	0.523013	0.639926
	1	0.196655	0.33899	0.205023
	2	0.0690863	0.109858	0.0846824
	3	0.0605325	0.0237347	0.0375924
	4	0.019239	0.00384591	0.0172686
	5	0.00848544	0.000498543	0.00809259
	6	0.00176932	5.3855e-05	0.00384241
	7	0.000216748	4.98657e-06	0.00184136
	8	2.5762e-05	4.04005e-07	0.000888506
	9	0	2.9095e-08	0.000431015
	10	0	1.88579e-09	0.000209974
