# Supplementary material for: Superspreaders drive the largest outbreaks of hospital onset COVID-19 infections
Source: eLife. 2021 Aug 24;10:e67308. doi: 10.7554/eLife.67308 (PMC8384420; doi:10.7554/eLife.67308)
Supplement: Figure 4—figure supplement 3—source data 1. [file elife-67308-fig4-figsupp3-data1.xlsx]

## Sheet: Sheet1
	A1 to A6	A6 to A7	A6 to A4	A6 to A2	A6 to A10	A10 to A11	A10 to A9	A10 to A8	A10 to A3	A10 to A0
0	1	0	0	0	0	0	0	0	0	0
1	0	0.0108855	0.0105964	0.00830364	0.000622993	0	0	0	0	0
2	0	0.0248727	0.0245363	0.0200429	0.00501457	2.29888e-05	1.47564e-05	1.41066e-05	3.65673e-05	1.51521e-05
3	0	0.047342	0.0469978	0.0401878	0.0174681	0.000350868	0.00023938	0.000211136	0.00054299	0.000224963
4	0	0.0770869	0.0768225	0.0682542	0.0398185	0.00218727	0.001536	0.00130261	0.00324437	0.00137643
5	0	0.110904	0.110975	0.101456	0.0706843	0.00854038	0.00618431	0.00502742	0.0118834	0.00532846
6	0	0.143611	0.143771	0.1351	0.106882	0.0230821	0.0173316	0.0134392	0.0300481	0.0146353
7	0	0.1677	0.167966	0.162367	0.143687	0.0470311	0.0368818	0.0274291	0.0577152	0.0311054
8	0	0.173166	0.173468	0.174025	0.174732	0.0787675	0.0646413	0.0469469	0.0921592	0.0552273
9	0	0.147708	0.147968	0.158013	0.191187	0.11473	0.0981378	0.07106	0.129193	0.0856378
10	0	0.0834924	0.0836413	0.102918	0.169172	0.149755	0.132962	0.0975762	0.16306	0.118792
11	0	0.0132181	0.0132451	0.0283641	0.0738192	0.176754	0.162841	0.122642	0.185803	0.149065
12	0	1.36268e-05	1.36567e-05	0.000967911	0.00690924	0.181607	0.176222	0.137619	0.179443	0.165867
13	0	0	0	4.7566e-09	3.56904e-06	0.146497	0.15783	0.130891	0.124303	0.156224
14	0	0	0	0	0	0.0573821	0.091692	0.0937801	0.0223859	0.10897
15	0	0	0	0	0	0.0131886	0.0439181	0.0818436	0.000182694	0.0694312
16	0	0	0	0	0	0.000104363	0.00950004	0.0658243	0	0.0316421
17	0	0	0	0	0	0	6.77116e-05	0.0483547	0	0.00641621
18	0	0	0	0	0	0	0	0.0316586	0	4.243e-05
19	0	0	0	0	0	0	0	0.0174889	0	0
20	0	0	0	0	0	0	0	0.00689019	0	0
