# Supplementary material for: Superspreaders drive the largest outbreaks of hospital onset COVID-19 infections
Source: eLife. 2021 Aug 24;10:e67308. doi: 10.7554/eLife.67308 (PMC8384420; doi:10.7554/eLife.67308)
Supplement: Figure 4—figure supplement 4—source data 1. [file elife-67308-fig4-figsupp4-data1.xlsx]

## Sheet: Sheet1
	B0 to B3	B0 to B5	B0 to B7	B5 to B1	B5 to B4	B4 to B6	B4 to B8	B4 to B9
0	0.537455	0.661879	0.520068	0	0	0	0	0
1	0.234409	0.20068	0.222245	0.0102075	0.0102075	0	0	0
2	0.135473	0.0980927	0.138862	0.213136	0.213136	0.00871159	0.005563	0.0102075
3	0.0573388	0.0313795	0.0771548	0.415907	0.415907	0.183385	0.119673	0.213136
4	0.0248503	0.00664181	0.0318709	0.202271	0.202271	0.385922	0.301192	0.415907
5	0.00759708	0.00082623	0.00762561	0.111813	0.111813	0.233306	0.276866	0.202271
6	0.00177114	0.000168245	0.0015163	0.0386559	0.0386559	0.125355	0.176422	0.111813
7	0.00074885	0.000211631	0.000506333	0.00512696	0.00512696	0.0494976	0.0821389	0.0386559
8	0.00030497	0.000104158	0.000135848	0.00145069	0.00145069	0.0101383	0.0285552	0.00512696
9	5.14885e-05	1.72634e-05	1.54875e-05	0.00113218	0.00113218	0.0020343	0.00689743	0.00145069
10	0	0	0	0.000298748	0.000298748	0.00118378	0.00171366	0.00113218
11	0	0	0	0	0	0.000421306	0.00071647	0.000298748
12	0	0	0	0	0	4.48946e-05	0.000228402	0
13	0	0	0	0	0	3.99807e-07	3.37889e-05	0
14	0	0	0	0	0	0	2.66597e-07	0
