# Supplementary material for: Superspreaders drive the largest outbreaks of hospital onset COVID-19 infections
Source: eLife. 2021 Aug 24;10:e67308. doi: 10.7554/eLife.67308 (PMC8384420; doi:10.7554/eLife.67308)
Supplement: Figure 4—figure supplement 5—source data 1. [file elife-67308-fig4-figsupp5-data1.xlsx]

## Sheet: Distribution of timings
	D1 to D0	D1 to D4	D4 to D12	D4 to D2	D4 to D6
0	1	0	0	0	0
1	0	0.167495	0	0	0
2	0	0.205332	0	0.000310656	0
3	0	0.219823	0	0.00336736	0
4	0	0.200969	0	0.0205501	0
5	0	0.14455	0.00696422	0.0863591	0
6	0	0.06183	0.0515296	0.274163	0
7	0	0	0.148986	0.61525	0.2157
8	0	0	0.221631	0	0.471951
9	0	0	0.147922	0	0.312349
10	0	0	0	0	0
11	0	0	0.145033	0	0
12	0	0	0.277934	0	0
