# Supplementary material for: Superspreaders drive the largest outbreaks of hospital onset COVID-19 infections
Source: eLife. 2021 Aug 24;10:e67308. doi: 10.7554/eLife.67308 (PMC8384420; doi:10.7554/eLife.67308)
Supplement: Figure 5—figure supplement 1—source data 1. — Data are shown only for wards in which the inference was different from the original. [file elife-67308-fig5-figsupp1-data1.xlsx]

## Sheet: Ward B
						To
		B0	B1	B2	B3	B4	B5	B6	B7	B8	B9
	B0	0	0.40825	0	0.826089	1	0.937489	0	0.848341	0	0.686533
	B1	0	0	0	0	0	0	0	0	0	0
	B2	0	0	0	0	0	0	0	0	0	0
	B3	0	0	0	0	0	0.000669508	0	0.00303125	0	0.00379821
From	B4	0	0	0	0	0	0	0.974634	0	0.864756	0
	B5	0.0259467	0.247771	0	0.123286	0	0	0	0.13452	0	0.247543
	B6	0	0	0	0	0	0	0	0	0.135244	0
	B7	0	0.173677	0	0.0387929	0	0.0267086	0	0	0	0.0580313
	B8	0	0	0	0	0	0	0.0253663	0	0	0
	B9	0.00411962	0.170302	0	0.0118316	0	0.00916028	0	0.0141077	0	0

## Sheet: Ward D
								To
		D0	D1	D2	D3	D4	D5	D6	D7	D8	D9	D10	D11	D12	D13
	D0	0	0.499968	0.305176	0	0.506678	0	0.0239701	0	0	0	0	0	0.032409	0
	D1	0.500032	0	0.297306	0	0.487615	0	0.0261712	0	0	0	0	0	0.0304151	0
	D2	0	0	0	0	0.00570699	0	0	0	0	0	0	0	0.00205458	0
	D3	0	0	0	0	0	0	0	0	1	1	0	0	0	0
	D4	0	0	0.397518	0	0	0	0.949257	0	0	0	0	0	0.935121	0
From	D5	0	0	0	0	0	0	0	0	0	0	1	0	0	0
	D6	0	0	0	0	0	0	0	0	0	0	0	0	0	0
	D7	0	0	0	0	0	0	0	0	0	0	0	0	0	0
	D8	0	0	0	0	0	0	0	0	0	0	0	0	0	0
	D9	0	0	0	0	0	0	0	0	0	0	0	0	0	0
	D10	0	0	0	0	0	0	0	0	0	0	0	0	0	0
	D11	0	0	0	0	0	0	0	0	0	0	0	0	0	0
	D12	0	0	0	0	0	0	0.000602094	0	0	0	0	0	0	0
	D13	0	0	0	0	0	0	0	0	0	0	0	0	0	0

## Sheet: Ward E
													To
		E0	E1	E2	E3	E4	E5	E6	E7	E8	E9	E10	E11	E12	E13	E14	E15	E16	E17	E18
	E0	0	0	0	0	0	0	0	0	0	0	0	0	0	0	0	0	0	0	0
	E1	0	0	0	0	0	0	0	0	0	0	0	0	0	0	0	0	0	0	1
	E2	0	0	0	0	0	0	0	0	0	0	0	0	0	0	0	0	0	0	0
	E3	0	0	0	0	0	0	0	0	0	0	0	0	0	0	0	0	0	0	0
	E4	0	0	0	0	0	0	0	0	0	0	0	0	0	0	0	0	0	0	0
	E5	0	0	0	0	0	0	0	0	0	0	0	0	0	0	0	0	0	0	0
	E6	0	0	0	0	0	0	0	0	0	0	0	0	0	0	0	0	0	0	0
	E7	0	0	0	0	0	0	0	0	0	0	0	0	0	0	0	0	0	0	0
	E8	0	0	0	0	0	0	0	0	0	0	0	0	0	0	0	0	0	1	0
From	E9	0	0	0	0	0	0	0	0	0	0	0	0	0	0	0	0	0	0	0
	E10	0	0	0	0	0	0	0	0	0	0	0	0	0	0	0	0	0	0	0
	E11	0	0	0	0	0	0	0	0	0	0	0	0	0	0	0	0	0	0	0
	E12	0	0	0	0	0	0	1	0	0	0	0	0	0	0	0	0	0	0	0
	E13	0	0	0	0	0	0	0	0	0	0	0	0	0	0	0	1	0	0	0
	E14	0	0	0	0	0	0	0	0	0	0	0	0	0	0	0	0	0	0	0
	E15	0	0	0	0	0	0	0	0	0	0	0	0	0	0	0	0	0	0	0
	E16	0	0	0	0	0	0	0	0	0	0	0	0	0	0	0	0	0	0	0
	E17	0	0	0	0	0	0	0	0	0	0	0	0	0	0	0	0	0	0	0
	E18	0	0	0	0	0	0	0	0	0	0	0	0	0	0	0	0	0	0	0
