# Supplementary material for: Superspreaders drive the largest outbreaks of hospital onset COVID-19 infections
Source: eLife. 2021 Aug 24;10:e67308. doi: 10.7554/eLife.67308 (PMC8384420; doi:10.7554/eLife.67308)
Supplement: Figure 5—figure supplement 2—source data 1. [file elife-67308-fig5-figsupp2-data1.xlsx]

## Sheet: Ward A
				P(transmit to n individuals)
	0	1	2	3	4	5	6	7	8
A0	0.999746	0.000254258	1.21284e-07	1.07298e-12	0	0	0	0	0
A1	0	0.972084	0.0277258	0.00018989	2.48388e-07	1.59205e-12	0	0	0
A2	0.696304	0.240393	0.0570372	0.00624315	2.18622e-05	1.10593e-07	3.00196e-08	1.25264e-08	0
A3	0.966365	0.0323261	0.00130778	5.56511e-07	3.53805e-08	1.07887e-11	0	0	0
A4	0.577708	0.290598	0.112613	0.0190739	7.29336e-06	1.04901e-08	0	0	0
A6	0.000201361	0.0287232	0.167196	0.316004	0.294622	0.14878	0.0392246	0.00524919	0
A7	0.583084	0.254819	0.118693	0.0349205	0.00771381	0.000769312	1.01457e-06	0	0
A8	1	0	0	0	0	0	0	0	0
A9	0.999552	0.000446711	1.38529e-06	3.90279e-11	1.13516e-12	0	0	0	0
A10	0	8.15357e-05	0.0459962	0.333062	0.401975	0.178154	0.0328849	0.00645519	0.00139115
A11	0.991223	0.00850252	0.000273348	6.70013e-07	1.08555e-08	1.50565e-10	5.85851e-12	0	0
A5	1	0	0	0	0	0	0	0	0
A12	1	0	0	0	0	0	0	0	0

## Sheet: Ward B
				P(transmit to n individuals)
	0	1	2	3	4	5	6
B0	0	0.00135928	0.0200117	0.0909002	0.250871	0.432013	0.204845
B1	1	0	0	0	0	0	0
B2	1	0	0	0	0	0	0
B3	0.992532	0.00743784	3.04879e-05	5.33316e-08	0	0	0
B4	0	0.16061	0.83939	0	0	0	0
B5	0.465801	0.349351	0.133744	0.0426632	0.00796279	0.000477427	0
B6	0.864756	0.135244	0	0	0	0	0
B7	0.746302	0.216923	0.0304882	0.00583882	0.000448502	0	0
B8	0.974634	0.0253663	0	0	0	0	0
B9	0.801615	0.188525	0.00866688	0.00111242	7.92761e-05	1.77094e-06	0

## Sheet: Ward C
		P(transmit to n individuals)
	0	1	2	3
C0	0	1	0	0
C1	0	1	0	0
C2	0.884742	0.113088	0.00217053	0
C3	0	1	0	0
C4	0.00696635	0.704701	0.249646	0.0386863
C5	1	0	0	0
C6	1	0	0	0
C7	1	0	0	0
C8	0.781131	0.169432	0.0484589	0.000978351
C9	1	0	0	0
C10	0.218869	0.578904	0.190404	0.0118226
C11	0	0	0	1
C13	1	0	0	0
C14	1	0	0	0
C15	1	0	0	0
C16	1	0	0	0
C17	1	0	0	0

## Sheet: Ward D
			P(transmit to n individuals)
	0	1	2	3	4	5
D0	0.174596	0.397679	0.319174	0.102167	0.00624617	0.000137597
D1	0.180991	0.403862	0.313504	0.096027	0.00549323	0.000122993
D2	0.992294	0.00765091	5.53325e-05	0	0	0
D3	0	0	1	0	0	0
D4	0.00306254	0.0698618	0.569192	0.357883	0	0
D5	0	1	0	0	0	0
D6	1	0	0	0	0	0
D7	1	0	0	0	0	0
D8	1	0	0	0	0	0
D9	1	0	0	0	0	0
D10	1	0	0	0	0	0
D11	1	0	0	0	0	0
D12	0.999398	0.000602094	0	0	0	0
D13	1	0	0	0	0	0

## Sheet: Ward E
		P(transmit to n individuals)
	0	1	2	3	4	5	6
E0	1	0	0	0	0	0	0
E1	0	1	0	0	0	0	0
E2	1	0	0	0	0	0	0
E3	1	0	0	0	0	0	0
E4	1	0	0	0	0	0	0
E5	1	0	0	0	0	0	0
E6	1	0	0	0	0	0	0
E7	1	0	0	0	0	0	0
E8	0	1	0	0	0	0	0
E9	1	0	0	0	0	0	0
E10	1	0	0	0	0	0	0
E11	1	0	0	0	0	0	0
E12	0	1	0	0	0	0	0
E13	0	1	0	0	0	0	0
E14	1	0	0	0	0	0	0
E15	1	0	0	0	0	0	0
E16	1	0	0	0	0	0	0
E17	1	0	0	0	0	0	0
E18	1	0	0	0	0	0	0

## Sheet: Model fits
			Probability
	Number infected	Data	Poisson model	Neg. binomial model
	0	0.676345	0.574616	0.677107
	1	0.199591	0.318368	0.192777
	2	0.063418	0.0881966	0.0743006
	3	0.0332682	0.0162886	0.0311316
	4	0.0131816	0.00225619	0.0135665
	5	0.0102764	0.00025001	0.00604868
	6	0.00374265	2.30865e-05	0.00273743
	7	0.000158167	1.82731e-06	0.001252
	8	1.87993e-05	1.26553e-07	0.000577121
	9	0	7.79083e-09	0.000267644
	10	0	4.31654e-10	0.000124721
