# Supplementary material for: Superspreaders drive the largest outbreaks of hospital onset COVID-19 infections
Source: eLife. 2021 Aug 24;10:e67308. doi: 10.7554/eLife.67308 (PMC8384420; doi:10.7554/eLife.67308)
Supplement: Figure 5—figure supplement 5—source data 1. — The values reported here show convergence in the model with the addition of further networks. [file elife-67308-fig5-figsupp5-data1.xlsx]

## Sheet: Sheet1
P(Edge in network)
Partial	Full
0	0
0	0
0	0
8.74158e-05	0.000157156
0	0
0	0
0	0
0	0
3.86965e-05	8.09698e-05
0	0
7.48797*10^-6	1.63748e-05
0	0
0	0
0.00646257	0.00995094
0	0
0	0
0.993318	0.991238
0.0197614	0.0239569
0	0
0	0
1.70929e-05	2.06617e-05
0.00186703	0.0029403
0.0176729	0.022124
0	0
0	0
0.036387	0.0486486
0.0207045	0.0355152
0.000494497	0.00132233
0.0591753	0.0590031
0	0
0.0249912	0.0362046
0.133062	0.15063
0.0110891	0.0198377
0.00104338	0.00203128
0	0
0.00141443	0.00311715
0	0
0.00068765	0.00149832
7.2593*10^-8	4.71703*10^-7
0.00225635	0.0030223
0	0
0.00245341	0.00371303
0.012347	0.0201801
0.000575018	0.0013808
0.0222567	0.0374411
0	0
0.0511889	0.0884704
0.0638021	0.0919677
0	0
1.03825e-05	4.14154e-05
0.0460055	0.0649323
0	0
0.0303538	0.0495898
0.189767	0.208727
0.0160525	0.0319045
0.13053	0.133395
0	0
0.764972	0.726411
0.315918	0.308595
0.896769	0.872234
0	0
0.858915	0.834861
0	0
0.0878714	0.0985184
0.455386	0.41121
0.0694909	0.120382
0.038753	0.0453455
0	0
0.120288	0.114395
0.089474	0.103173
0.067943	0.0759256
0.0061772	0.00739827
0	0
0	0
0.0597331	0.0564756
0.208211	0.204549
0.0148029	0.0244121
0	0
0	0
0	0
0	0
0	0
0	0
0	0
0	0
0	0
0	0
0	0
3.23695e-05	8.07865e-05
0	0
3.93552e-05	9.89894e-05
0.00011571	0.000256635
0	0
0	0
0	0
0	0
0	0
0	0
5.59697*10^-6	1.30705e-05
0.789583	0.759045
0	0
0.0554223	0.0567484
0.493765	0.445487
0.0137962	0.0144796
3.49172*10^-11	2.22397*10^-11
0.013791	0.0138842
1	1
0.794409	0.754798
0	0
0.886109	0.799113
0.000128285	0.000536902
0	0
0.000212218	0.000808936
0.000450576	0.00171565
9.95117e-05	0.000347587
0	0
9.57758e-05	0.000339736
0	0
0.000149309	0.000619456
0.00120976	0.00468301
0	0
