# Supplementary material for: Superspreaders drive the largest outbreaks of hospital onset COVID-19 infections
Source: eLife. 2021 Aug 24;10:e67308. doi: 10.7554/eLife.67308 (PMC8384420; doi:10.7554/eLife.67308)
Supplement: Supplementary file 1. [file elife-67308-supp1.xlsx]

## Sheet: Sheet1
GISAID Identifiers
EPI_ISL_425231, EPI_ISL_425236, EPI_ISL_425263, EPI_ISL_425267, EPI_ISL_425269, EPI_ISL_425278, EPI_ISL_425307, EPI_ISL_425309, EPI_ISL_42531, EPI_ISL_425310, EPI_ISL_425311, EPI_ISL_425312, EPI_ISL_425314, EPI_ISL_425315, EPI_ISL_425426, EPI_ISL_425434, EPI_ISL_433479, EPI_ISL_433481, EPI_ISL_433490, EPI_ISL_433491, EPI_ISL_433492, EPI_ISL_433494, EPI_ISL_433495, EPI_ISL_433496, EPI_ISL_433497, …
