# Supplementary material for: Superspreaders drive the largest outbreaks of hospital onset COVID-19 infections
Source: eLife. 2021 Aug 24;10:e67308. doi: 10.7554/eLife.67308 (PMC8384420; doi:10.7554/eLife.67308)
Supplement: Supplementary file 2. [file elife-67308-supp2.xlsx]

## Sheet: Sheet1
COG-UK Sequence Identifiers
CAMB-1AA429, CAMB-1AAD2E, CAMB-1AAE58, CAMB-1AAE67, CAMB-1AB74D, CAMB-1AC014, CAMB-1AC120, CAMB-1AC14E, CAMB-1AC2C3, CAMB-1AC375, CAMB-1AD839, CAMB-1AD8B1, CAMB-1ADA06, CAMB-1ADA51, CAMB-1AE3BF, CAMB-1AEB6C, CAMB-1AEB7B, CAMB-1B050F, CAMB-1B2312, CAMB-1B2567, CAMB-1B426E, CAMB-1B428C, CAMB-1B42AA, CAMB-1B42C8, CAMB-1B42E6, CAMB-1B43C5, CAMB-1B43E3, CAMB-1B442C, CAMB-1B44OE, CAMB-1B45B0, CAMB-1B46…
